# Supplementary material for: Empiric treatment against invasive fungal diseases in febrile neutropenic patients: a systematic review and network meta-analysis
Source: Springer Nature journal article supplement (doi:10.1186/s12879-017-2263-6), 2017-02-20
Supplement: MOESM2 [file 12077922]

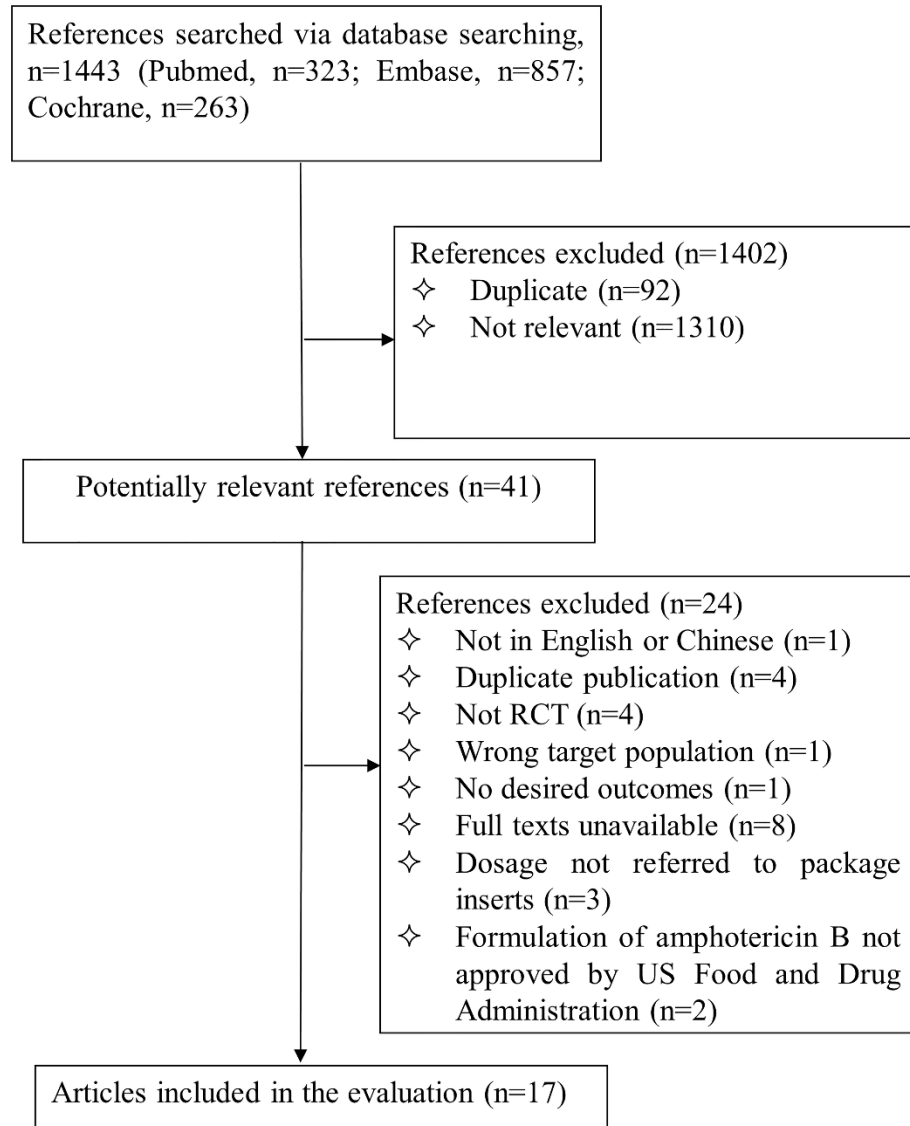

**Figure S1.** Flow chart of selection process

|                | Random sequence generation (selection bias) | Allocation concealment (selection bias) | Blinding of participants and personnel (performance bias) | Blinding of outcome assessment (detection bias) | Incomplete outcome data (attrition bias) | Selective reporting (reporting bias) | Other bias |
|----------------|---------------------------------------------|-----------------------------------------|-----------------------------------------------------------|-------------------------------------------------|------------------------------------------|--------------------------------------|------------|
| Boogaerts 2001 | +                                           | +                                       | +                                                         | ⊖                                               | ⊖                                        | +                                    | +          |
| Caselli 2012   | ?                                           | ?                                       | +                                                         | ?                                               | ⊖                                        | +                                    | +          |
| Groll 2010     | ?                                           | ?                                       | +                                                         | ⊖                                               | +                                        | +                                    | +          |
| Jadhav 2012    | +                                           | ?                                       | +                                                         | ?                                               | +                                        | +                                    | +          |
| Jeong 2016     | +                                           | +                                       | +                                                         | ?                                               | +                                        | +                                    | +          |
| Maertens 2010  | +                                           | +                                       | +                                                         | +                                               | +                                        | +                                    | +          |
| Meunier 1989   | ?                                           | ?                                       | +                                                         | +                                               | ⊖                                        | +                                    | +          |
| Oyake 2015     | +                                           | ?                                       | +                                                         | +                                               | +                                        | +                                    | +          |
| Prentice 1997  | +                                           | +                                       | +                                                         | ?                                               | +                                        | +                                    | +          |
| Schiel 2006    | +                                           | ?                                       | +                                                         | +                                               | +                                        | +                                    | +          |
| Schuler 2007   | +                                           | ?                                       | +                                                         | +                                               | +                                        | +                                    | +          |
| Viscoli 1996   | +                                           | +                                       | +                                                         | ⊖                                               | +                                        | +                                    | +          |
| Walsh 1999     | +                                           | +                                       | +                                                         | +                                               | +                                        | +                                    | +          |
| Walsh 2002     | +                                           | +                                       | +                                                         | +                                               | +                                        | +                                    | +          |
| Walsh 2004     | +                                           | +                                       | +                                                         | +                                               | +                                        | +                                    | +          |
| Wang 2007      | ?                                           | ?                                       | +                                                         | ⊖                                               | +                                        | +                                    | +          |
| Wingard 2000   | ?                                           | ?                                       | +                                                         | +                                               | +                                        | +                                    | +          |

**Figure S2.** Risk of bias summary: review authors' judgements about each risk of bias item for each included study

Boogaerts 2001[17]; Caselli 2012[18]; Groll 2010[19]; Jadhav 2012[20]; Maertens 2010[21]; Meunier 1989[22]; Oyake 2015[23]; Prentice 1997[24]; Schiel 2006[25]; Schuler 2007[26]; Viscoli 1996[27]; Walsh 1999[28]; Walsh 2002[29]; Walsh 2004[30]; Wang 2007[31]; Wingard 2000[32]; Jeong 2016[33]

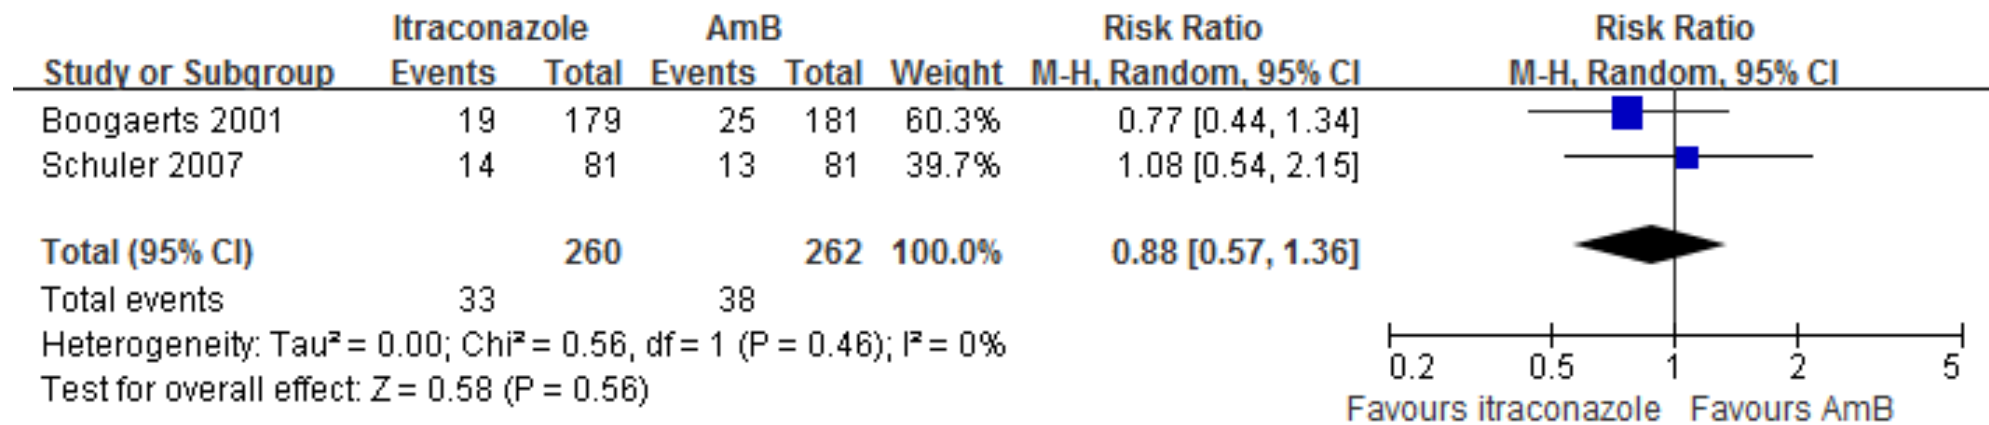

**Figure S3.** Forest plot of itraconazole versus conventional amphotericin B on all-cause mortality  
AmB: Conventional amphotericin B

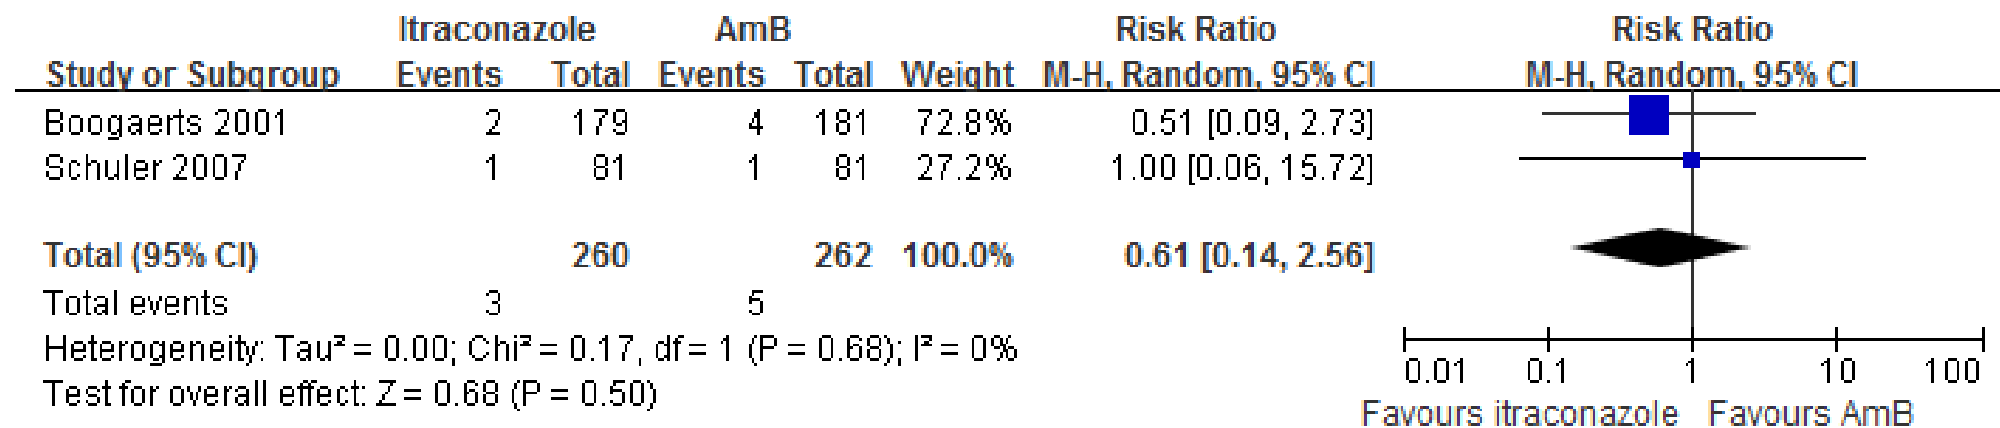

**Figure S4.** Forest plot of itraconazole versus conventional amphotericin B on fungal infection-related mortality

AmB: Conventional amphotericin B

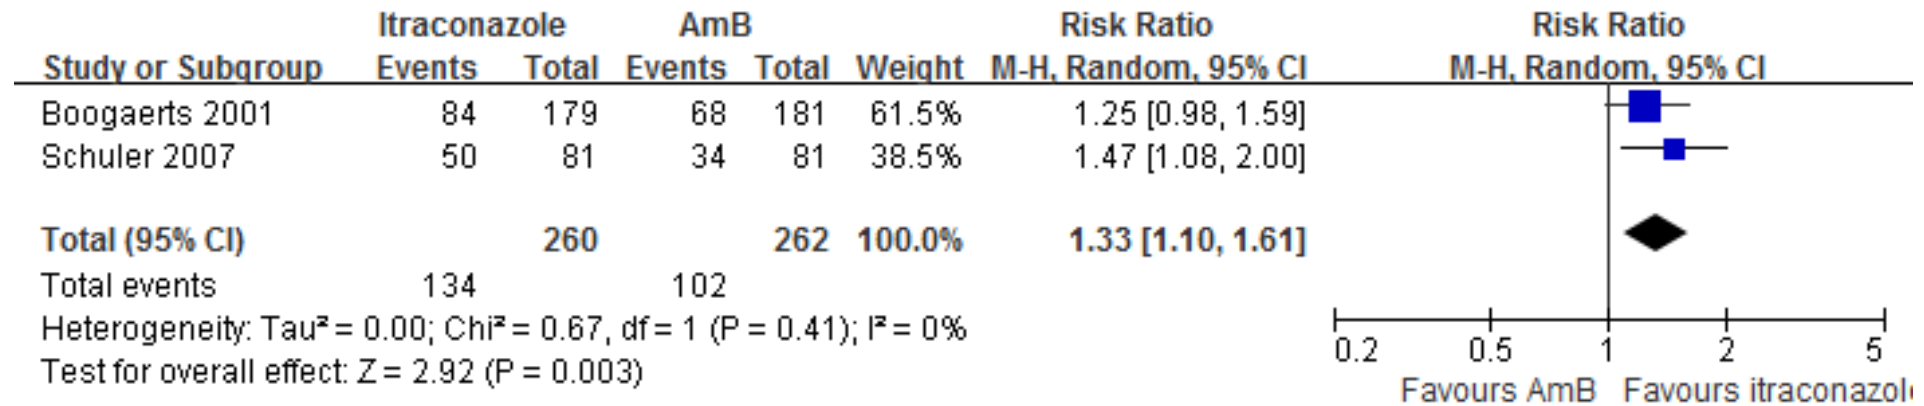

**Figure S5.** Forest plot of itraconazole versus conventional amphotericin B on treatment response  
 AmB: Conventional amphotericin B

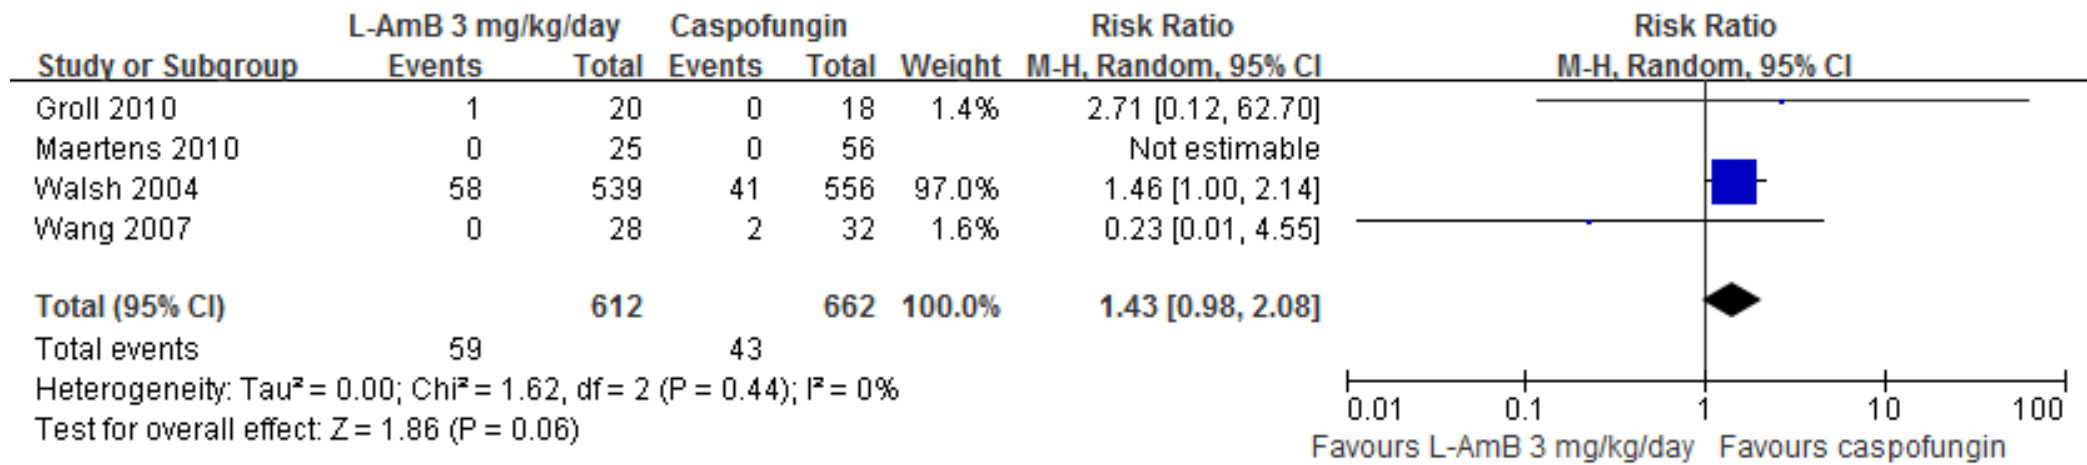

**Figure S6.** Forest plot of liposomal amphotericin B 3 mg/kg/day versus caspofungin on all-cause mortality  
 L-AmB: Liposomal amphotericin B

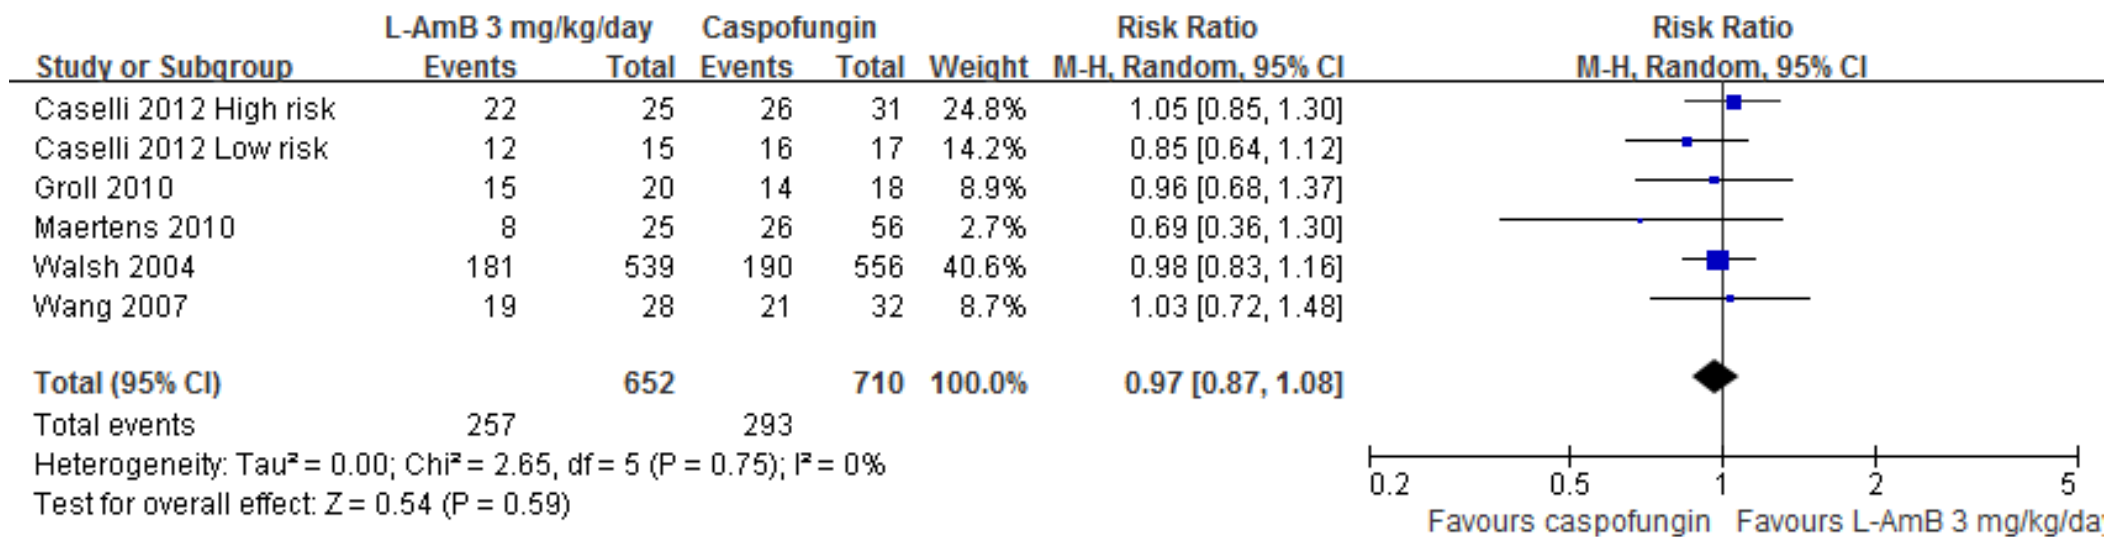

**Figure S7.** Forest plot of liposomal amphotericin B 3 mg/kg/day versus caspofungin on treatment response  
 L-AmB: Liposomal amphotericin B

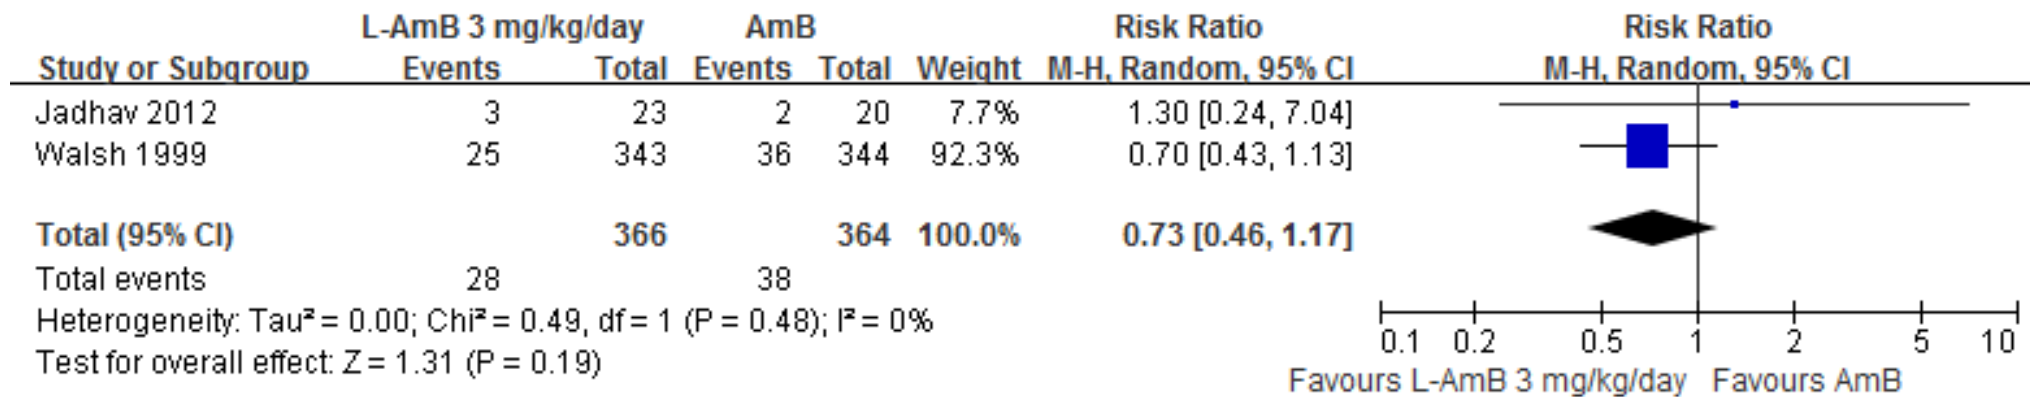

**Figure S8.** Forest plot of liposomal amphotericin B 3 mg/kg/day versus conventional amphotericin B on all-cause mortality

L-AmB: Liposomal amphotericin B; AmB: Conventional amphotericin B



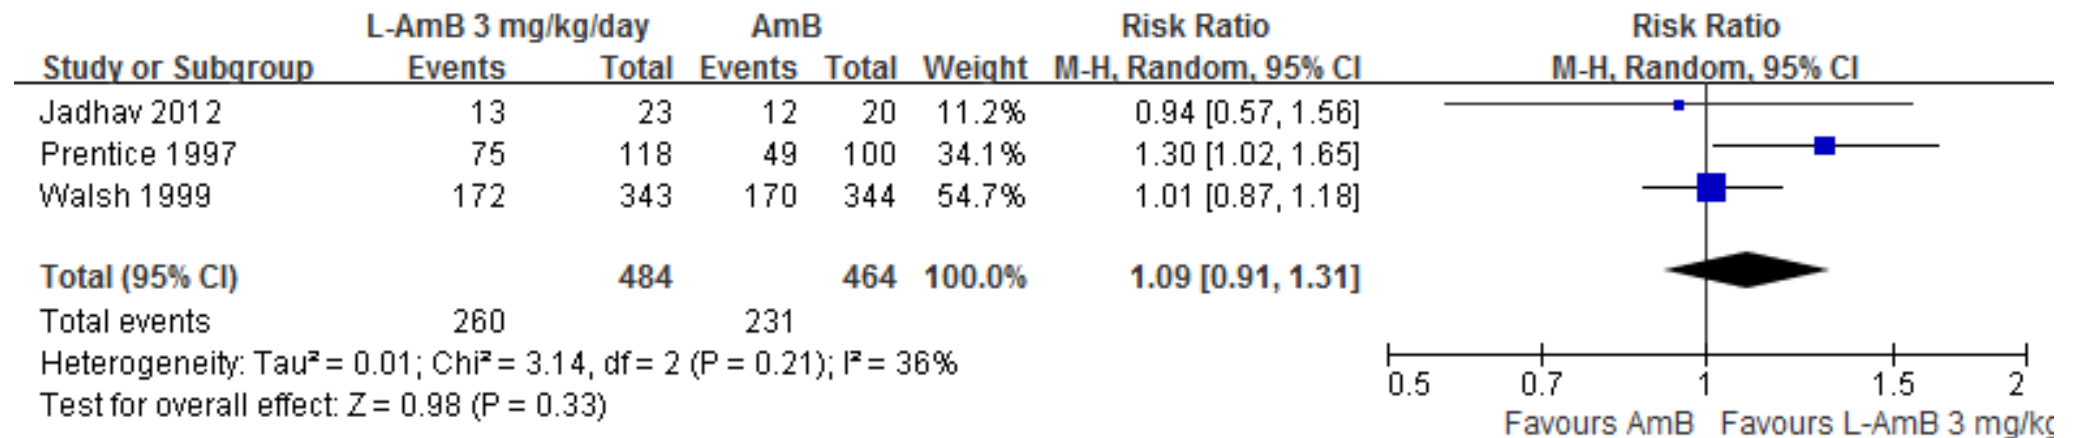

**Figure S9.** Forest plot of liposomal amphotericin B 3 mg/kg/day versus conventional amphotericin B on treatment response

L-AmB: Liposomal amphotericin B; AmB: Conventional amphotericin B

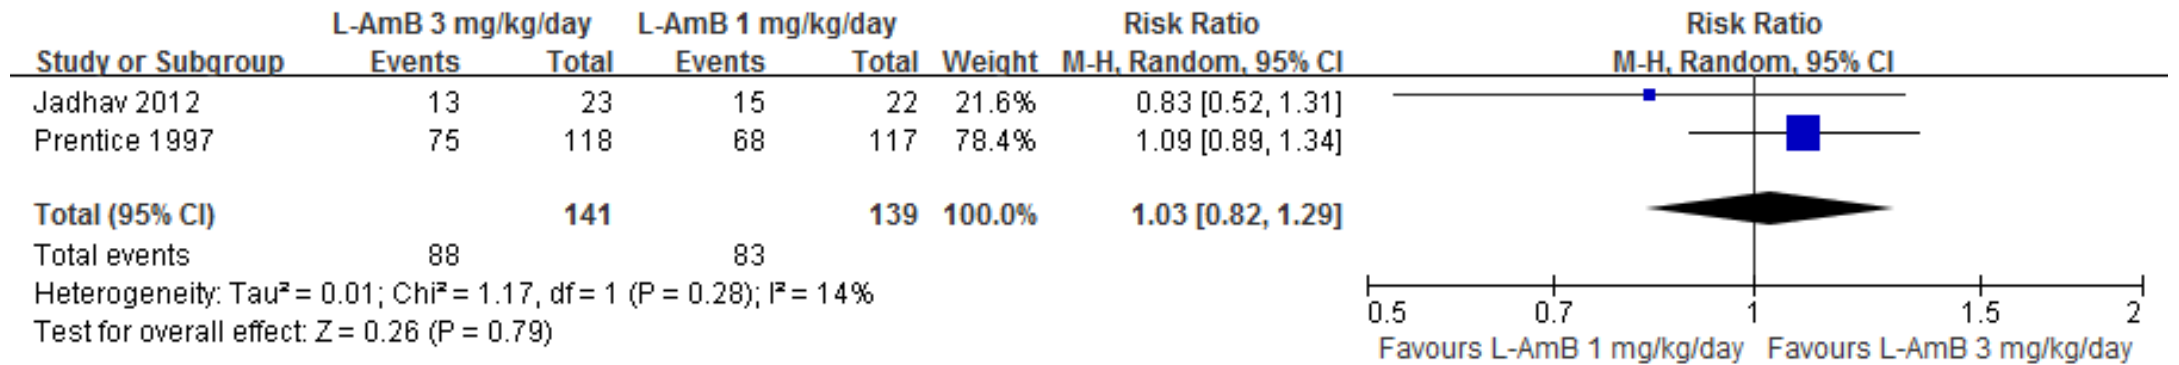

**Figure S10.** Forest plot of liposomal amphotericin B 3 mg/kg/day versus liposomal amphotericin B 1 mg/kg/day on treatment response  
 L-AmB: Liposomal amphotericin B

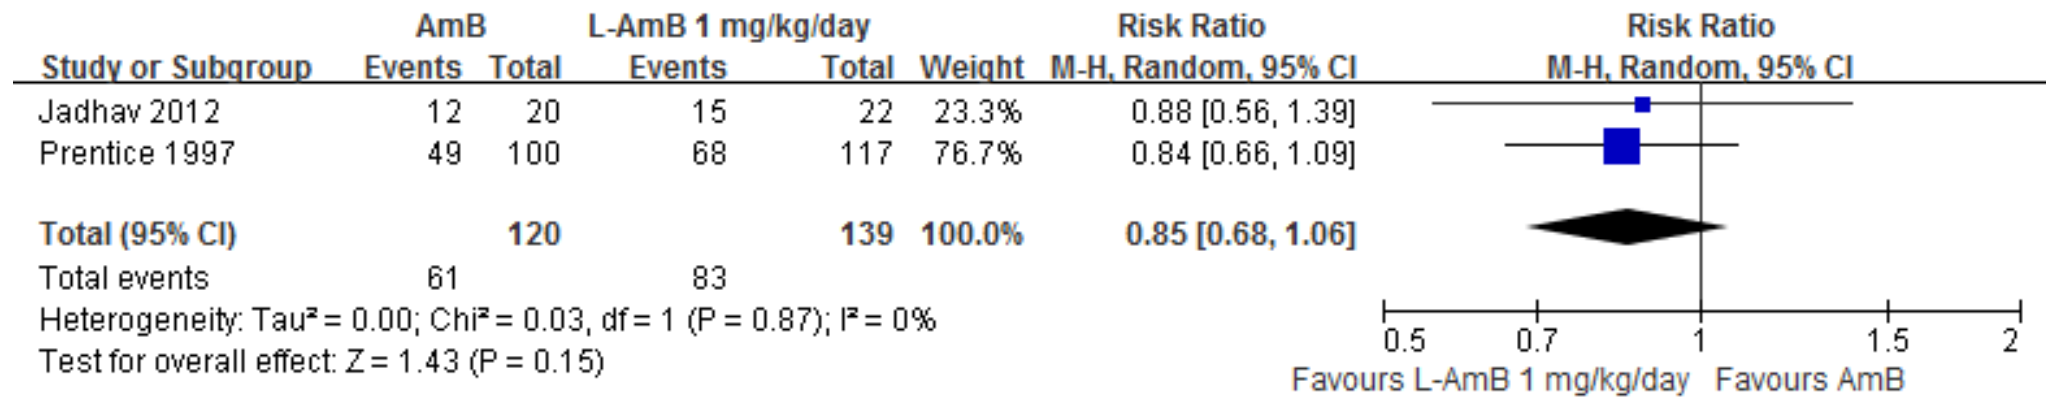

**Figure S11.** Forest plot of conventional amphotericin B versus liposomal amphotericin B 1 mg/kg/day versus on treatment response

AmB: Conventional amphotericin B; L-AmB: Liposomal amphotericin B

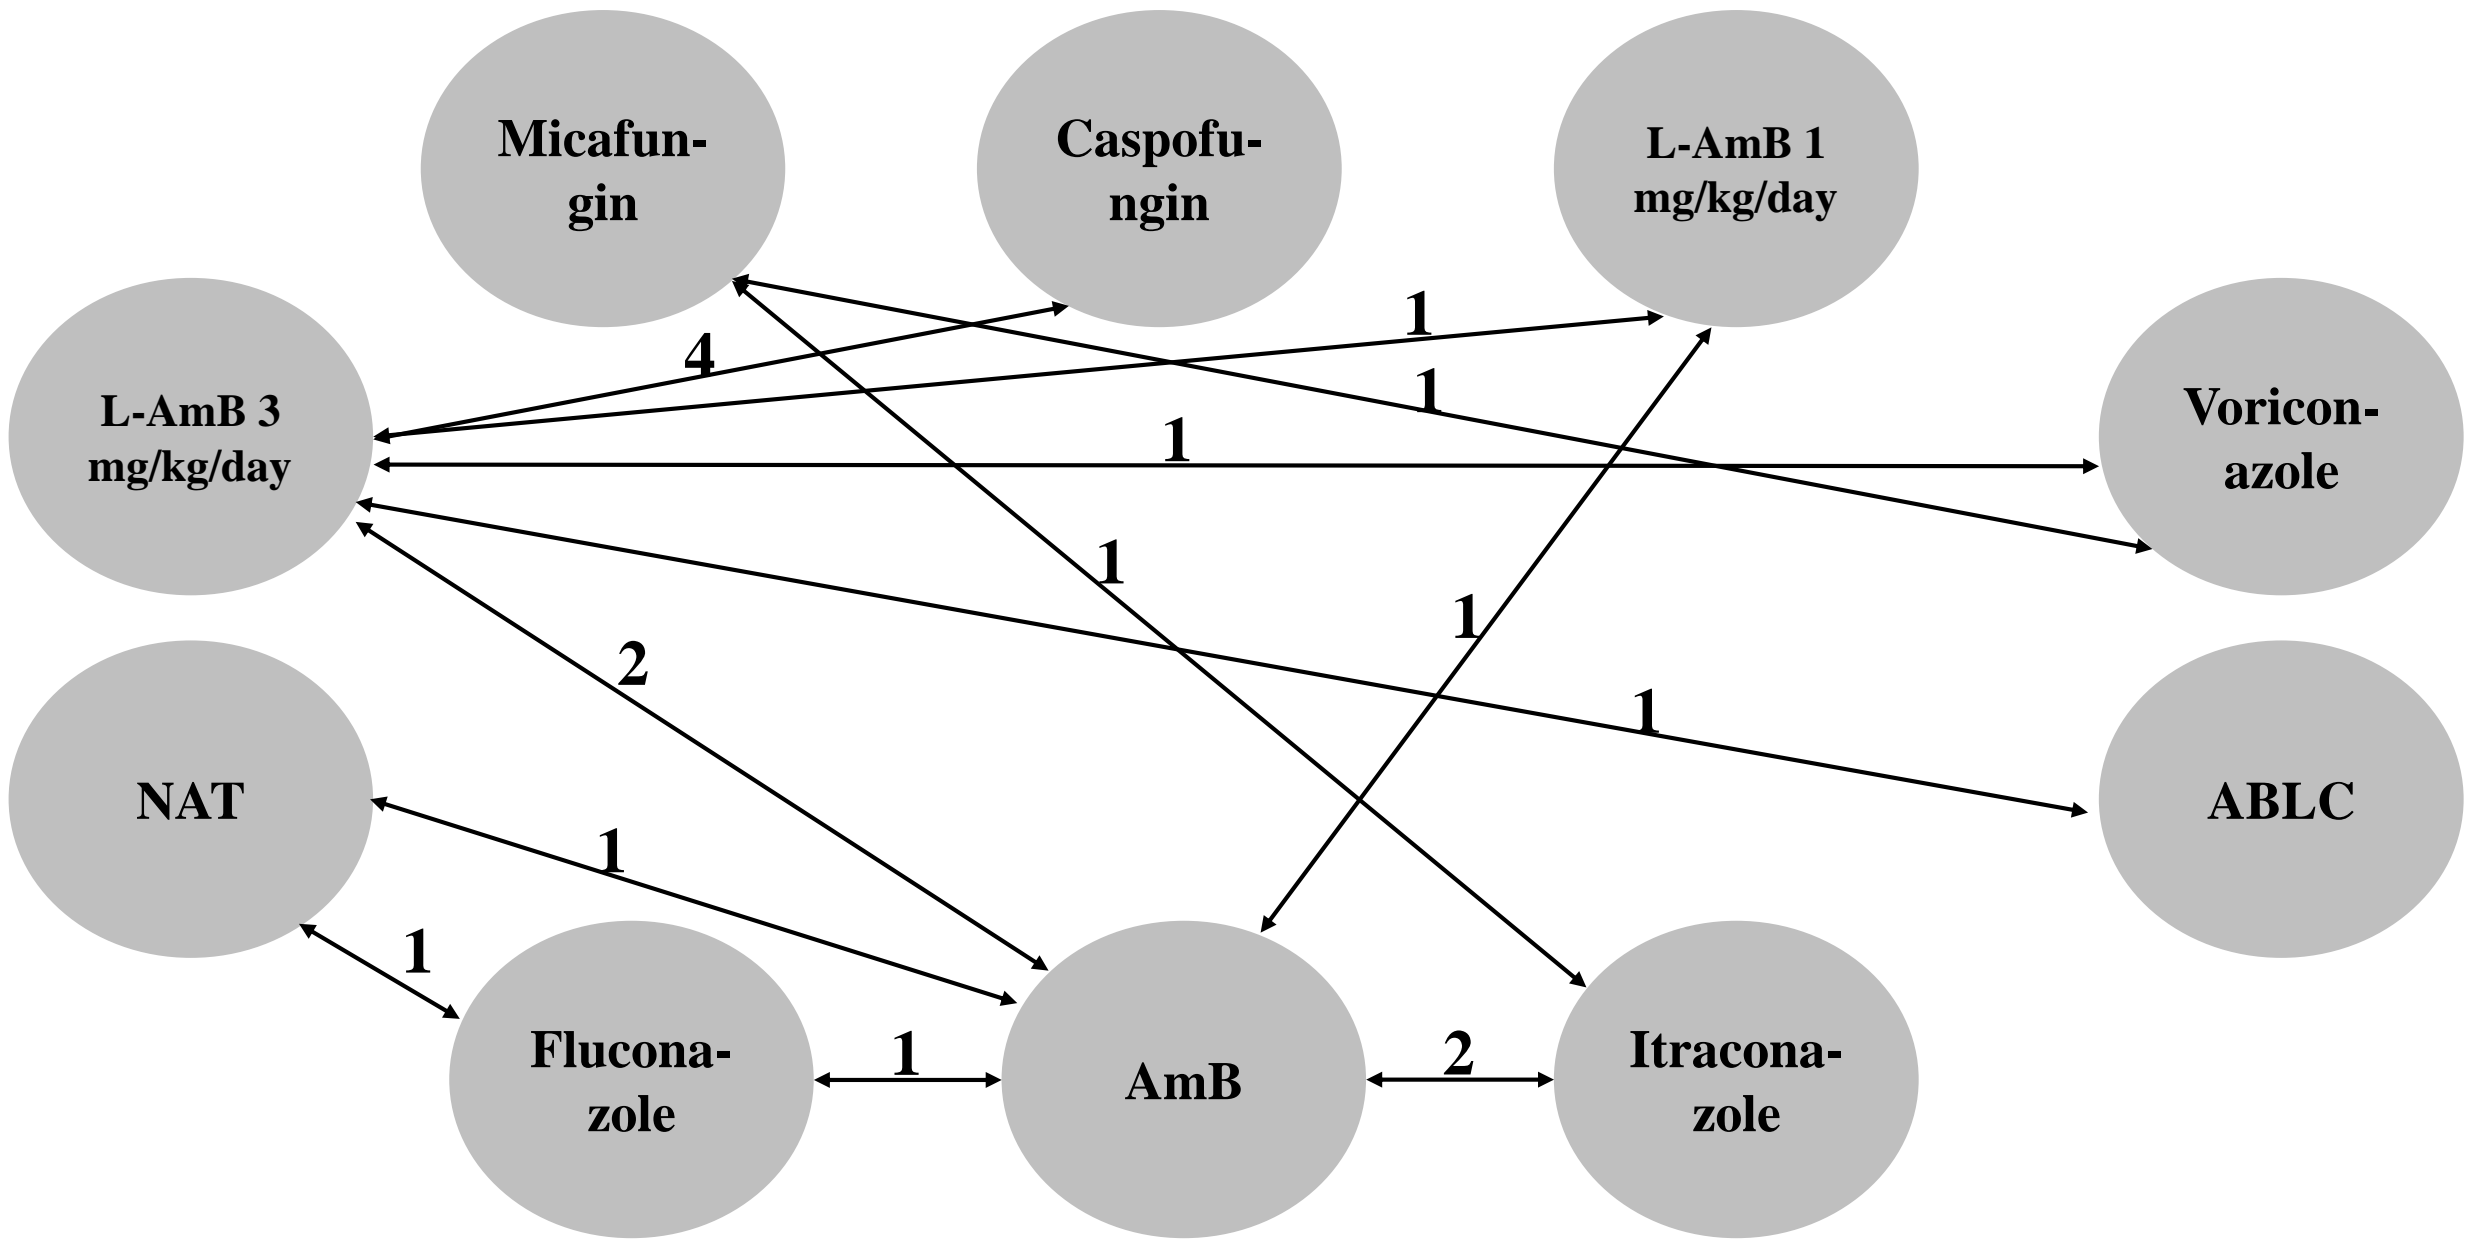

**Figure S12.** A schematic of the network of evidence for all-cause mortality

ABLC: Amphotericin B lipid complex; AmB: Conventional amphotericin B; L-AmB: Liposomal amphotericin B; NAT: No antifungal treatment

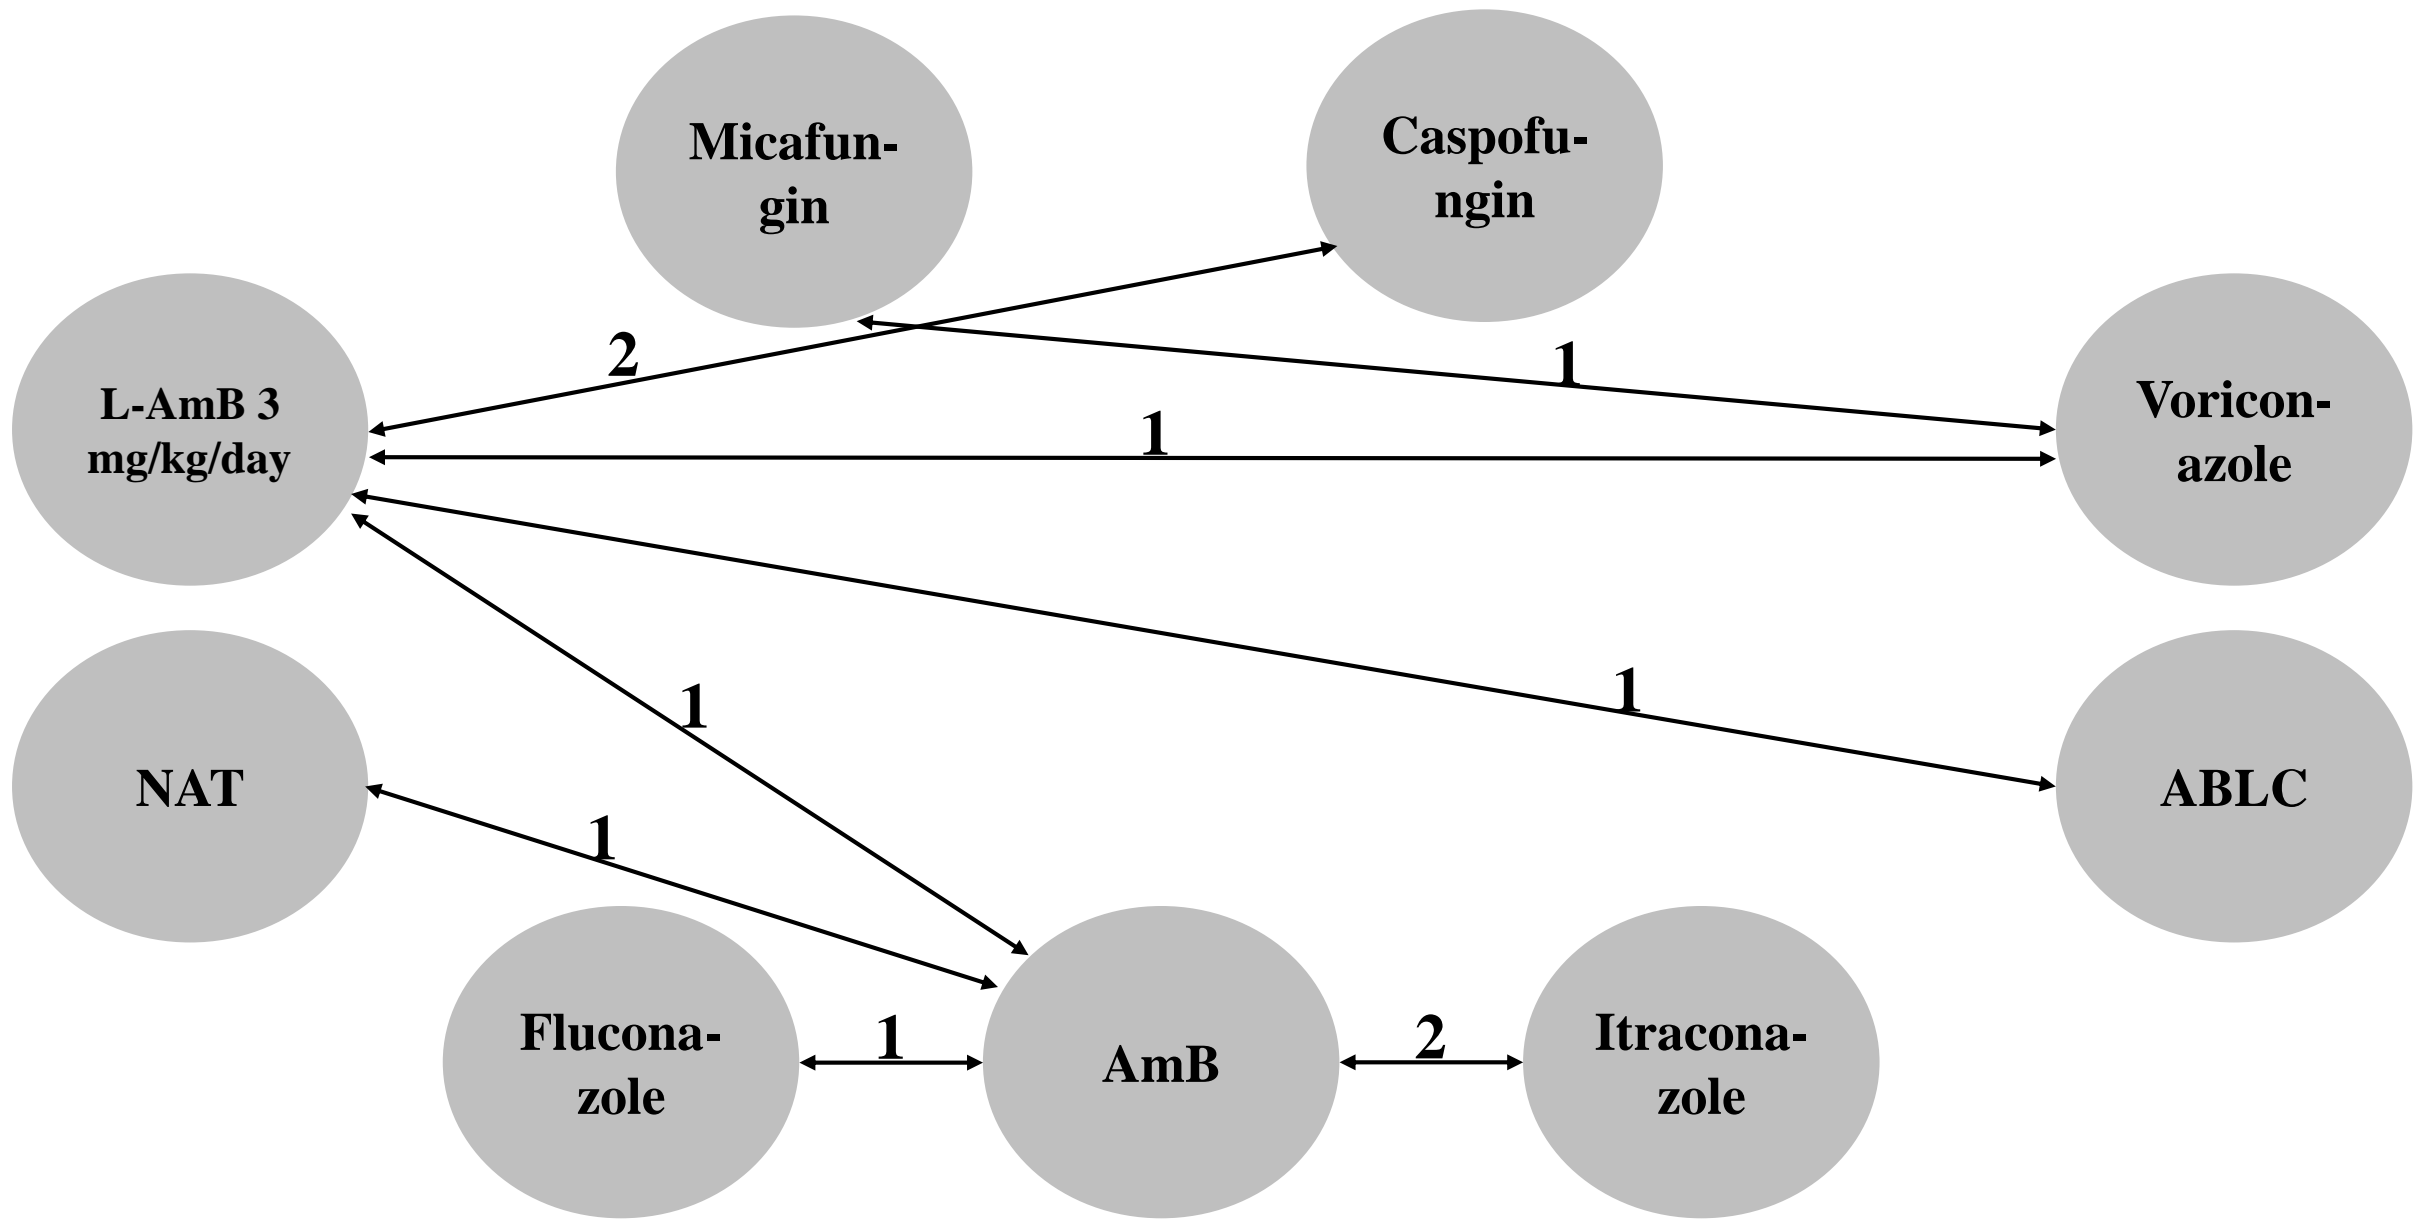

**Figure S13.** A schematic of the network of evidence for fungal infection-related mortality

ABLC: Amphotericin B lipid complex; AmB: Conventional amphotericin B; L-AmB: Liposomal amphotericin B; NAT:

No antifungal treatment

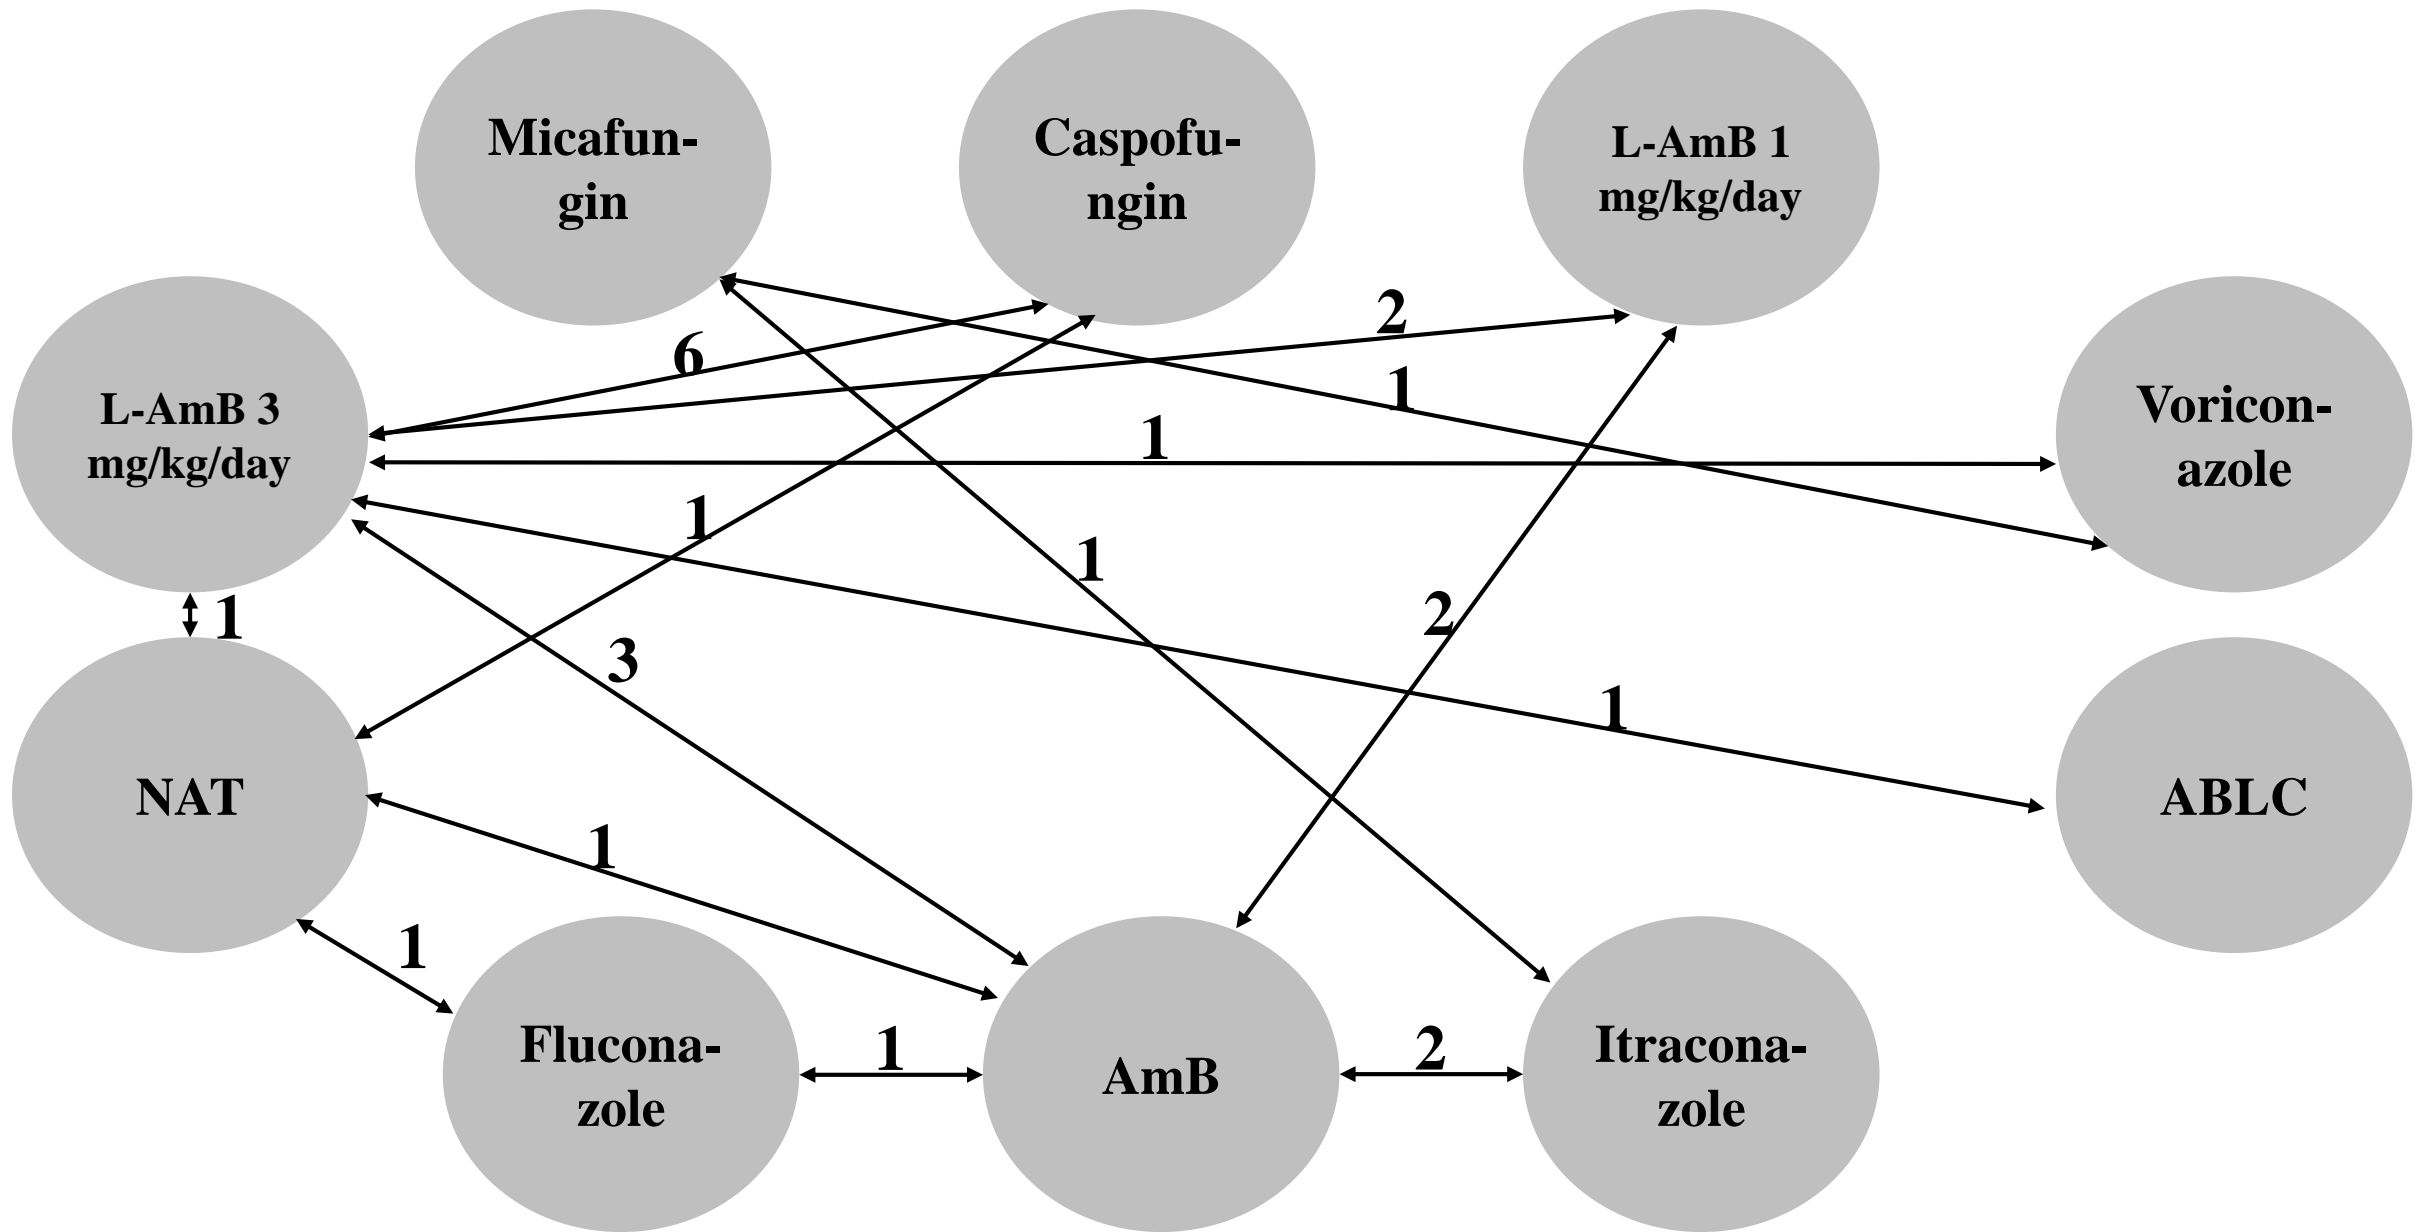

**Figure S14.** A schematic of the network of evidence for treatment response

ABLC: Amphotericin B lipid complex; AmB: Conventional amphotericin B; L-AmB: Liposomal amphotericin B; NAT: No antifungal treatment

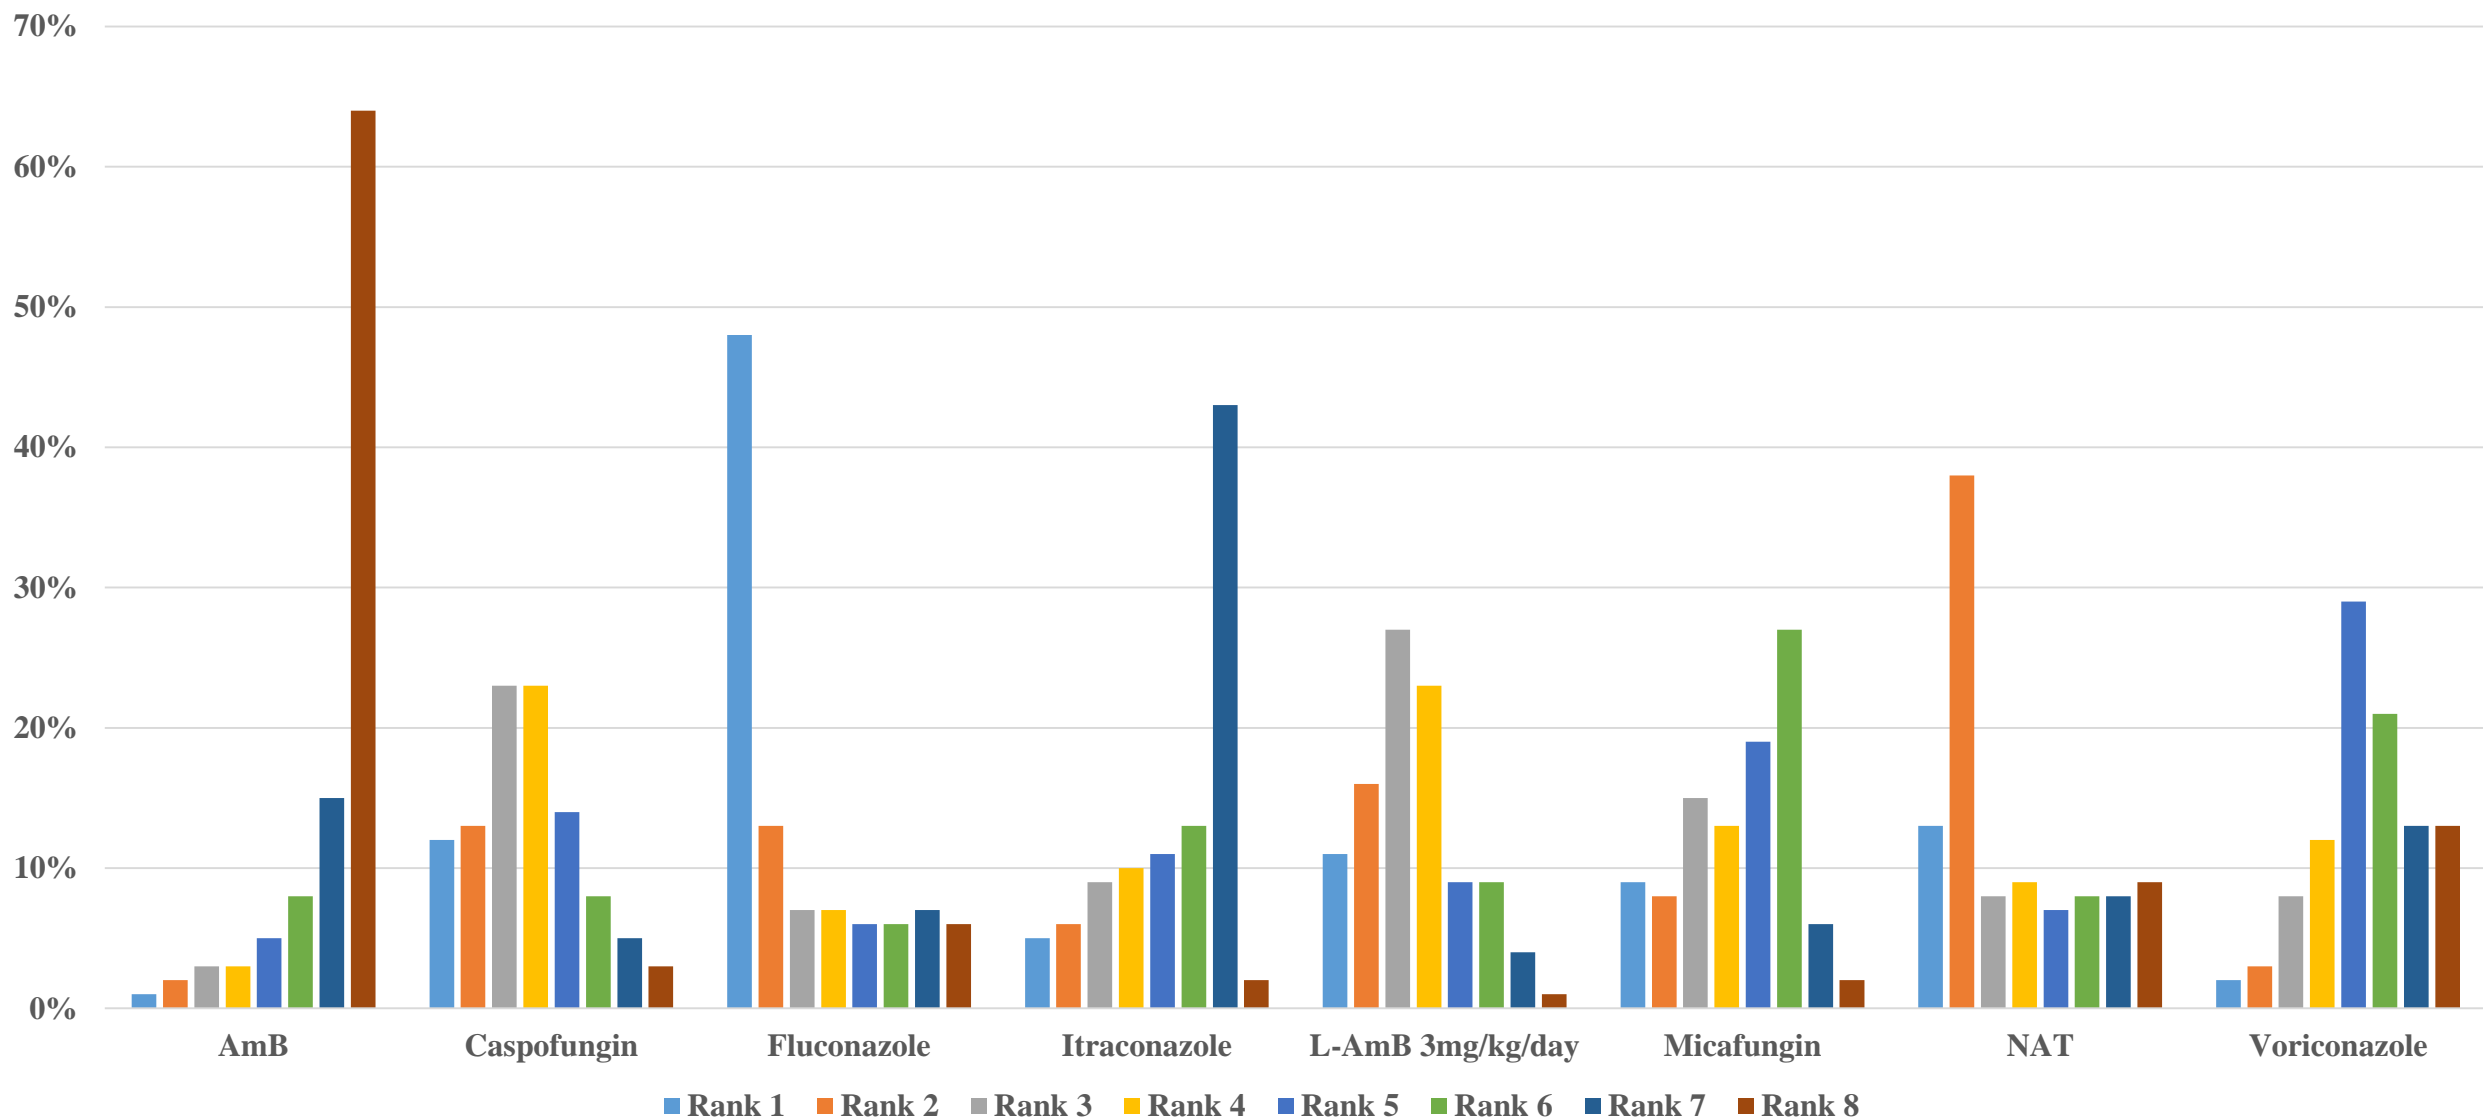

**Figure S15.** Rank probability plot of antifungals for treatment response in subgroup analysis of non-allogenic haematological stem cell transplantation

AmB: Conventional amphotericin B; L-AmB: Liposomal amphotericin B; NAT: No antifungal treatment

Rank 1 is best, rank 8 is worst.

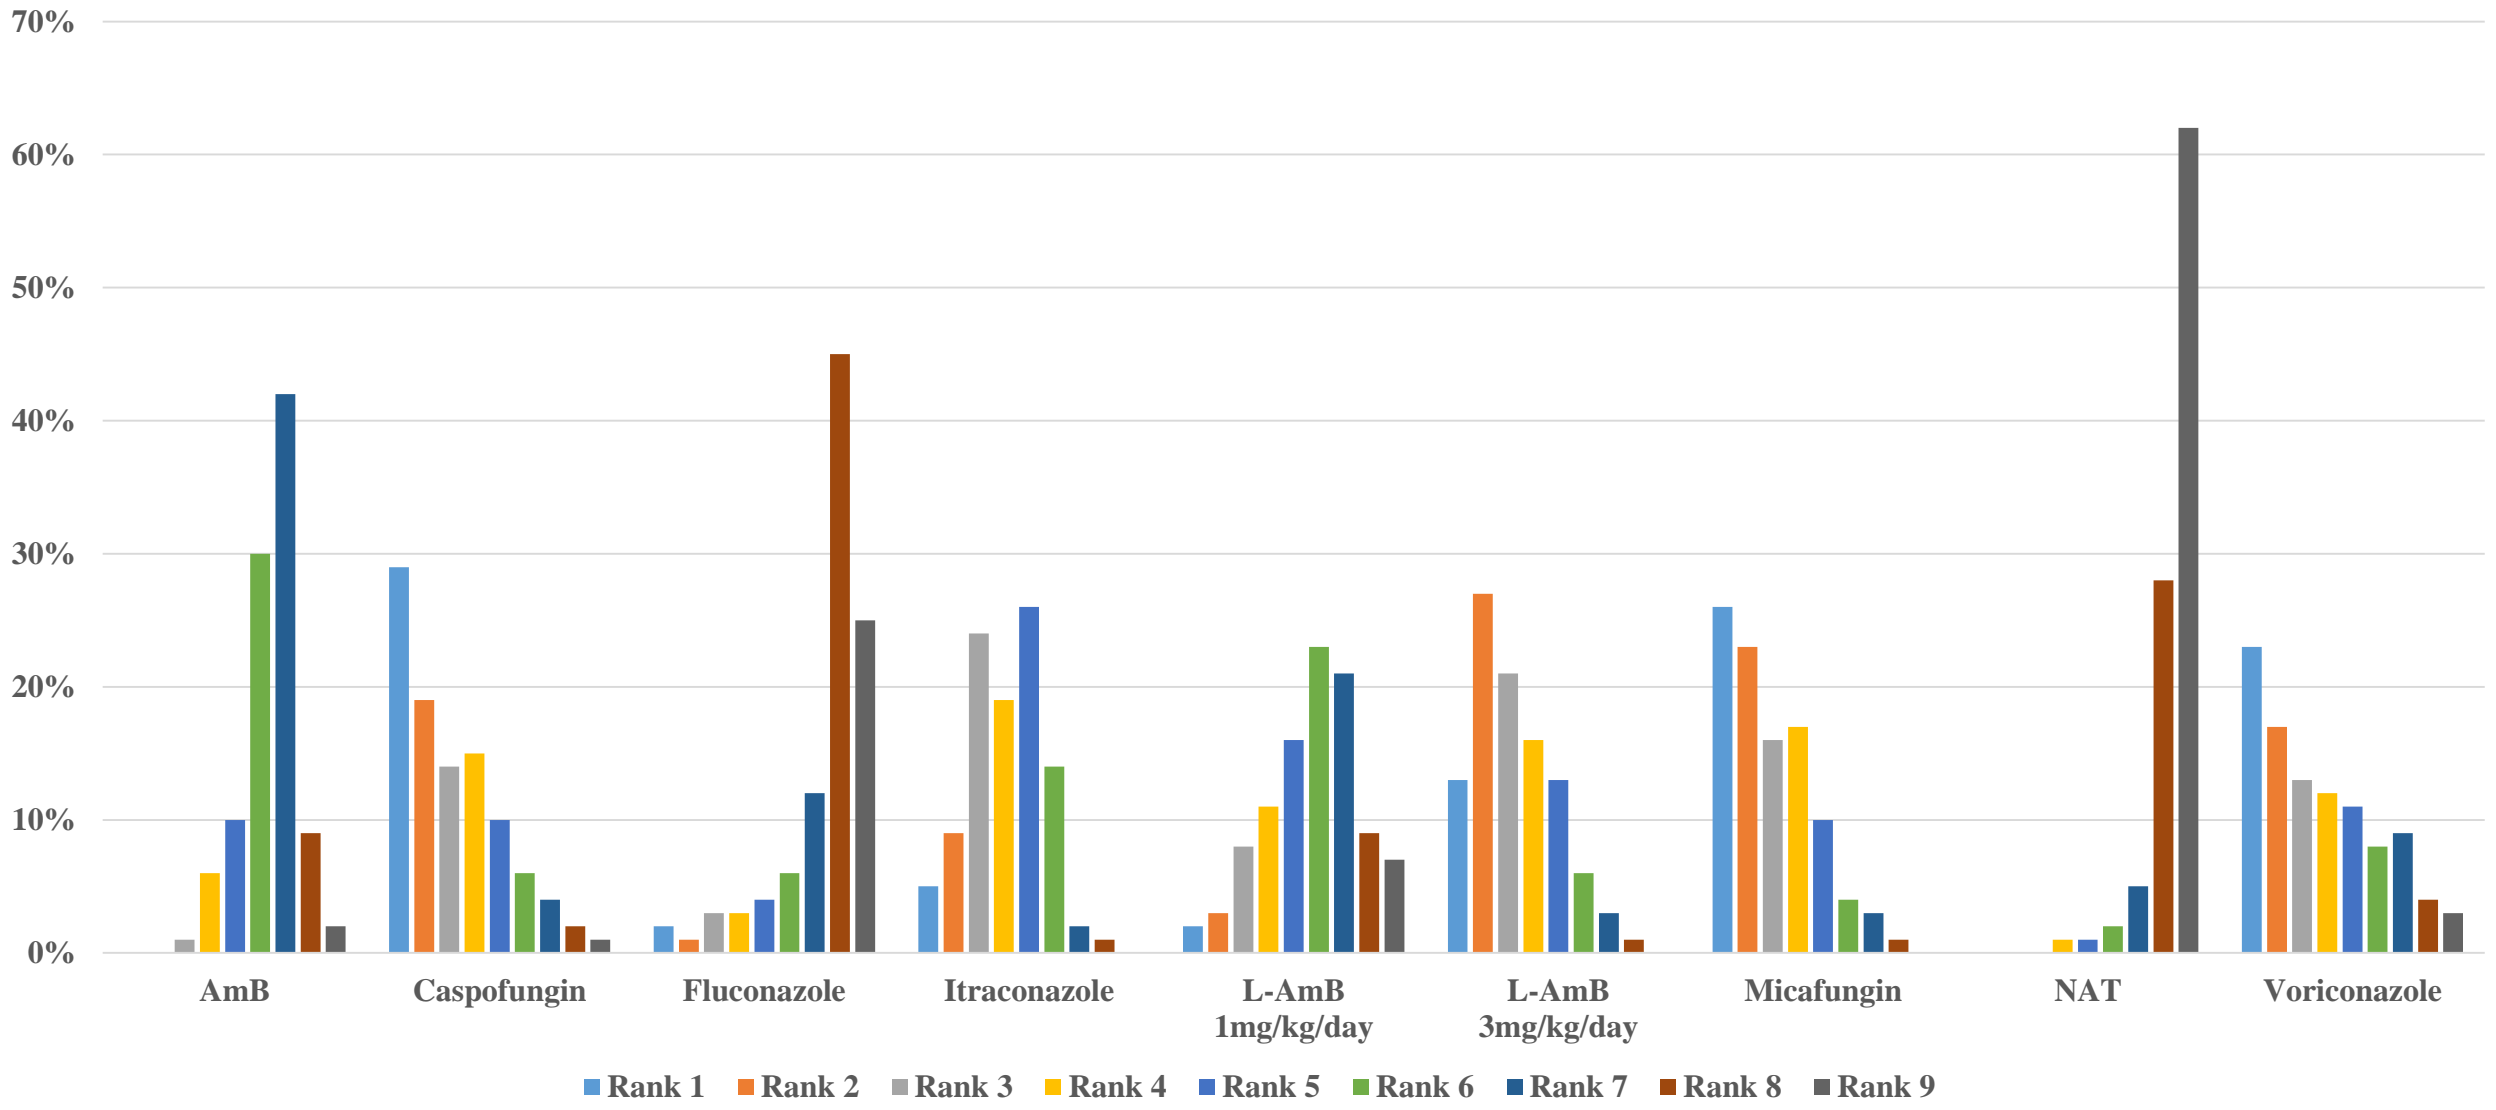

**Figure S16.** Rank probability plot of antifungals for treatment response in subgroup analysis of adults  
 AmB: Conventional amphotericin B; L-AmB: Liposomal amphotericin B; NAT: No antifungal treatment  
 Rank 1 is best, rank 9 is worst.



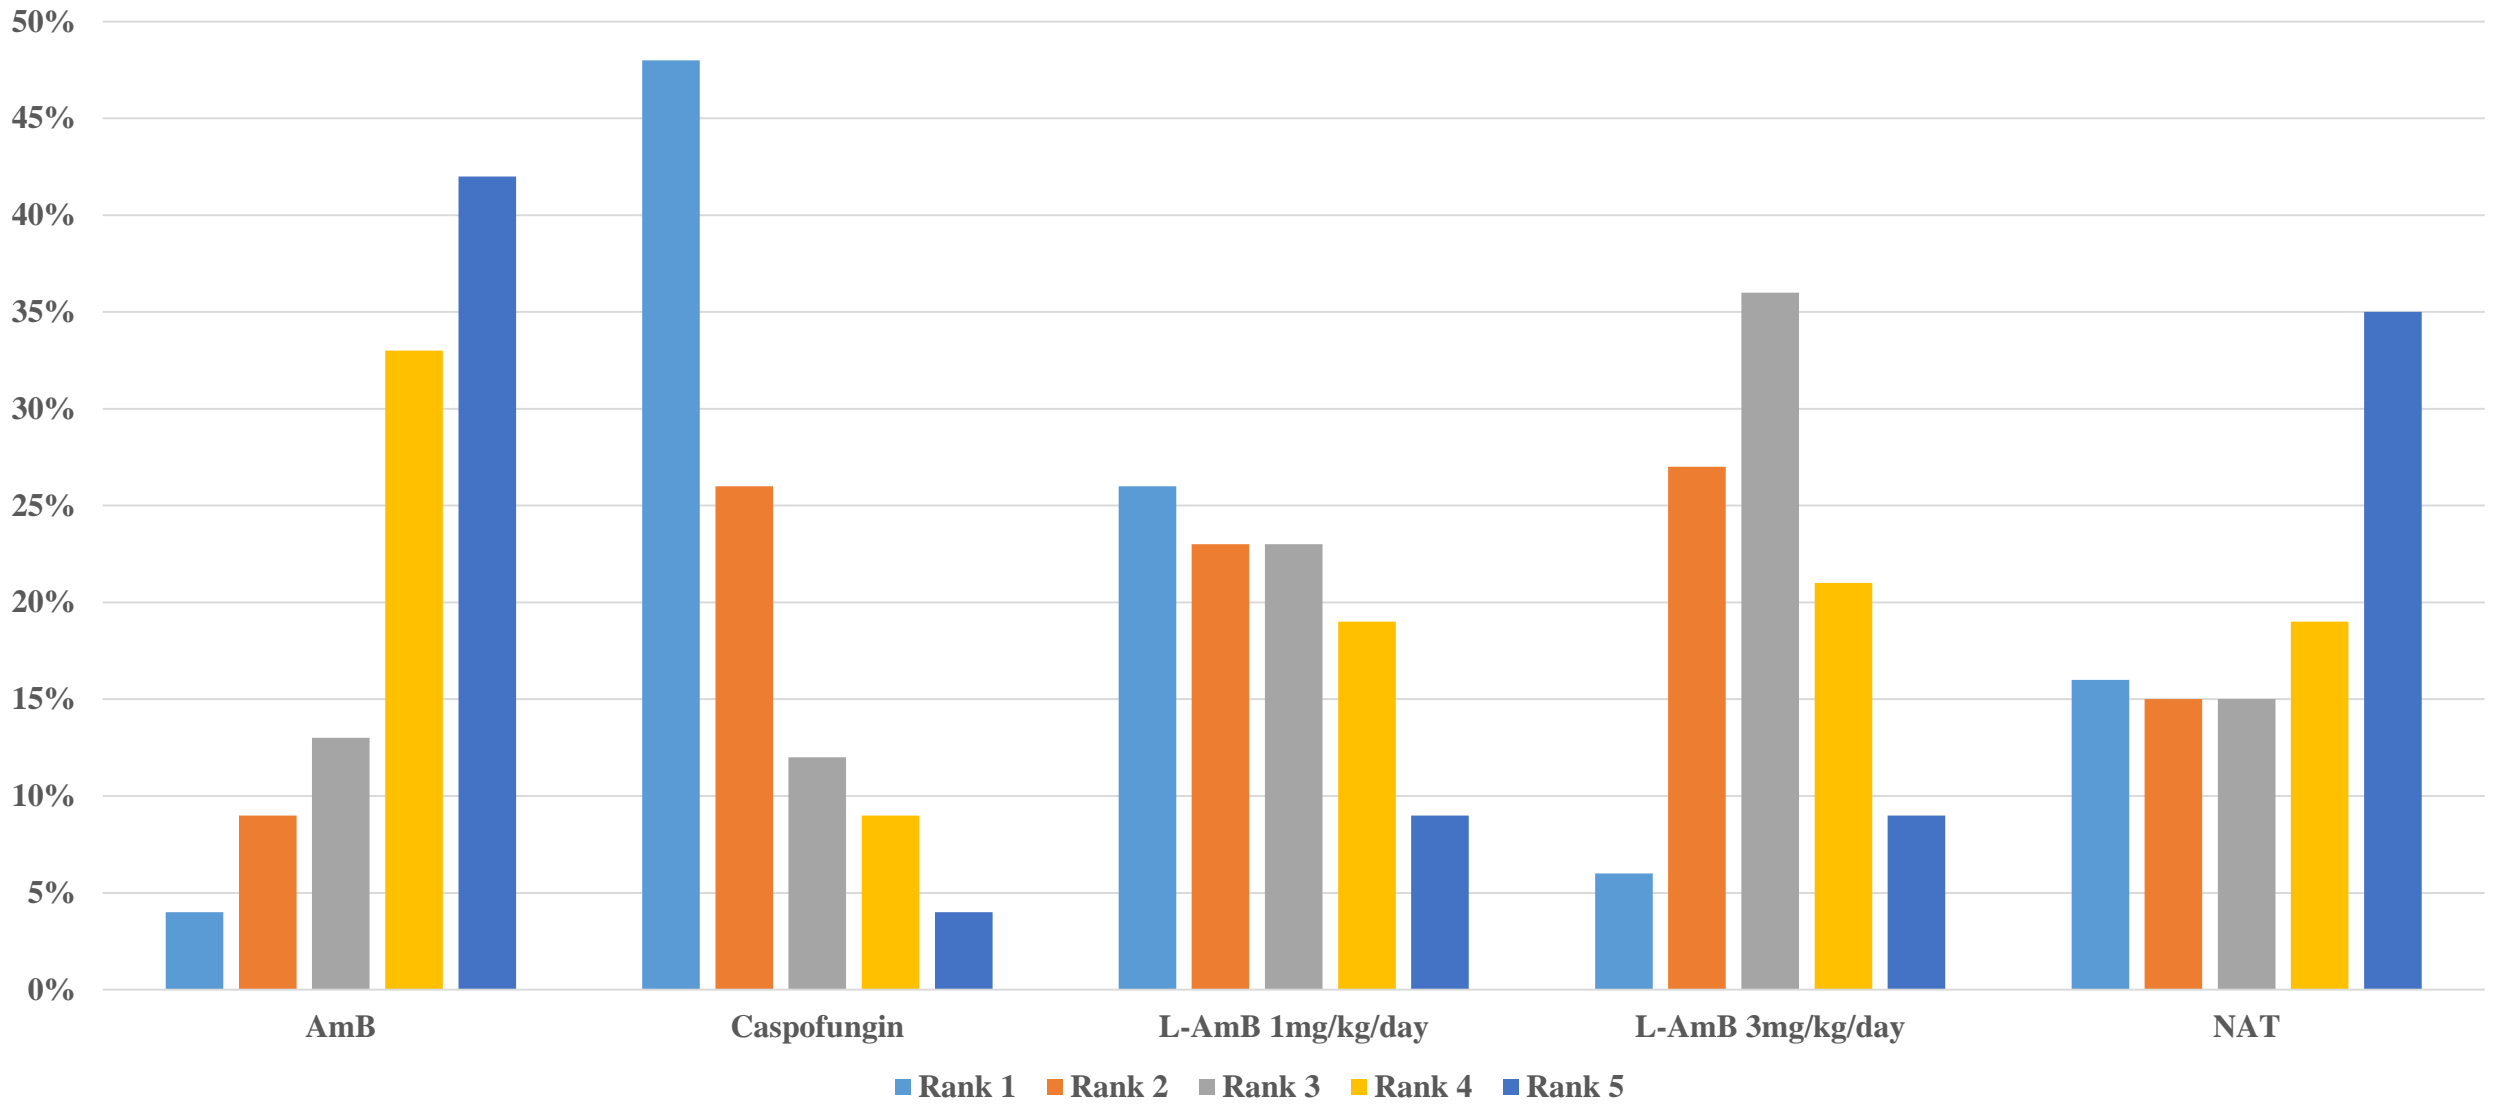

**Figure S17.** Rank probability plot of antifungals for treatment response in subgroup analysis of pediatrics  
 AmB: Conventional amphotericin B; L-AmB: Liposomal amphotericin B; NAT: No antifungal therapy  
 Rank 1 is best, rank 5 is worst.

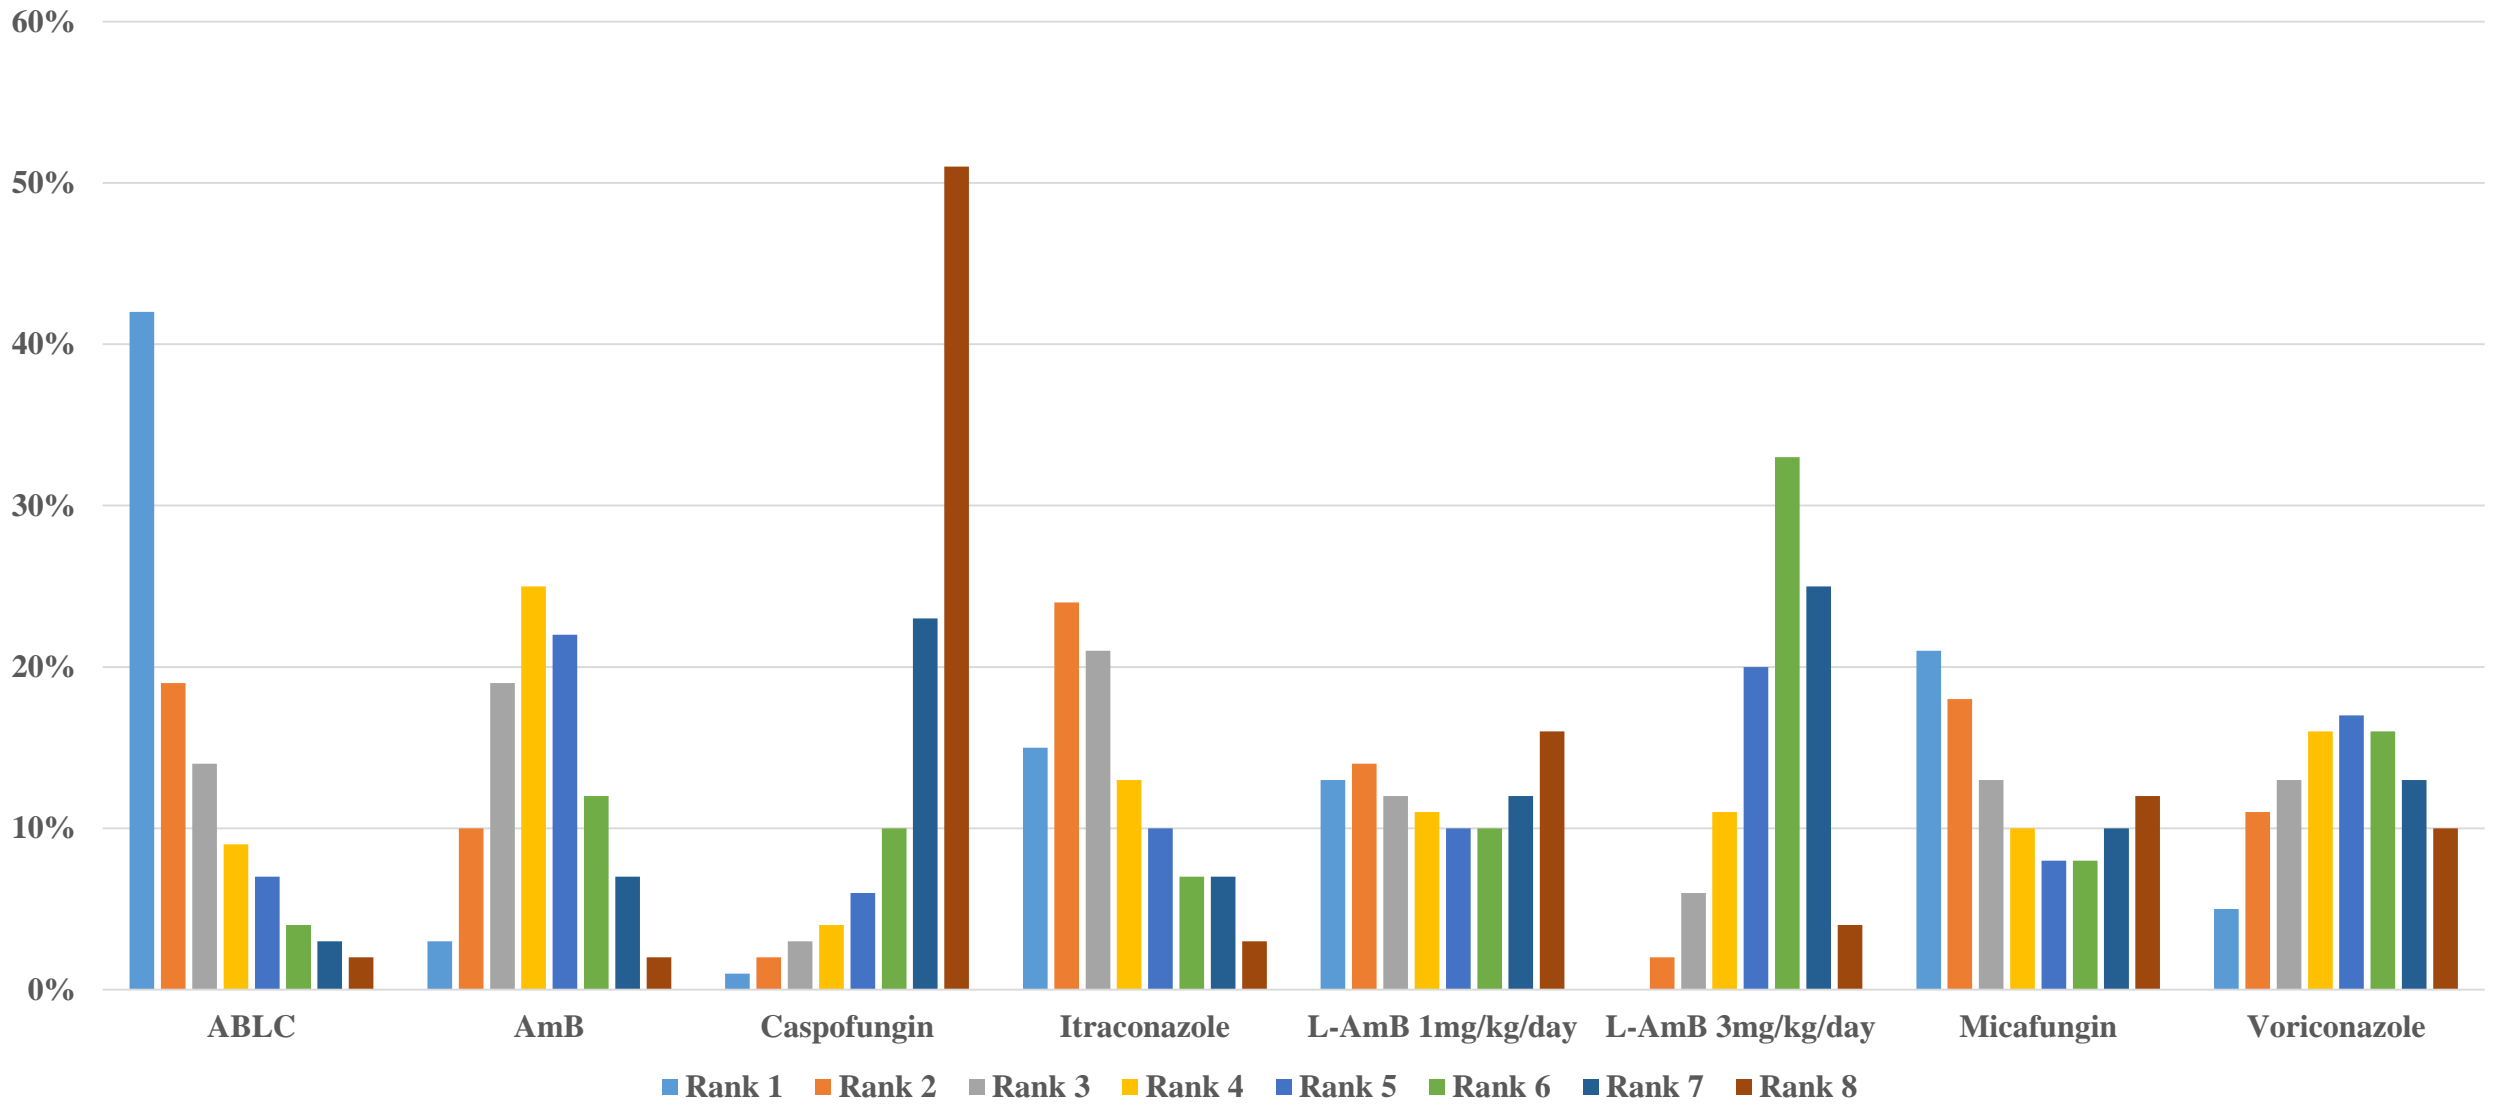

**Figure S18.** Rank probability plot of antifungals for all-cause mortality in sensitivity analysis  
 ABLC: Amphotericin B lipid complex; AmB: Conventional amphotericin B; L-AmB: Liposomal amphotericin B  
 Rank 1 is worst, rank 8 is best.

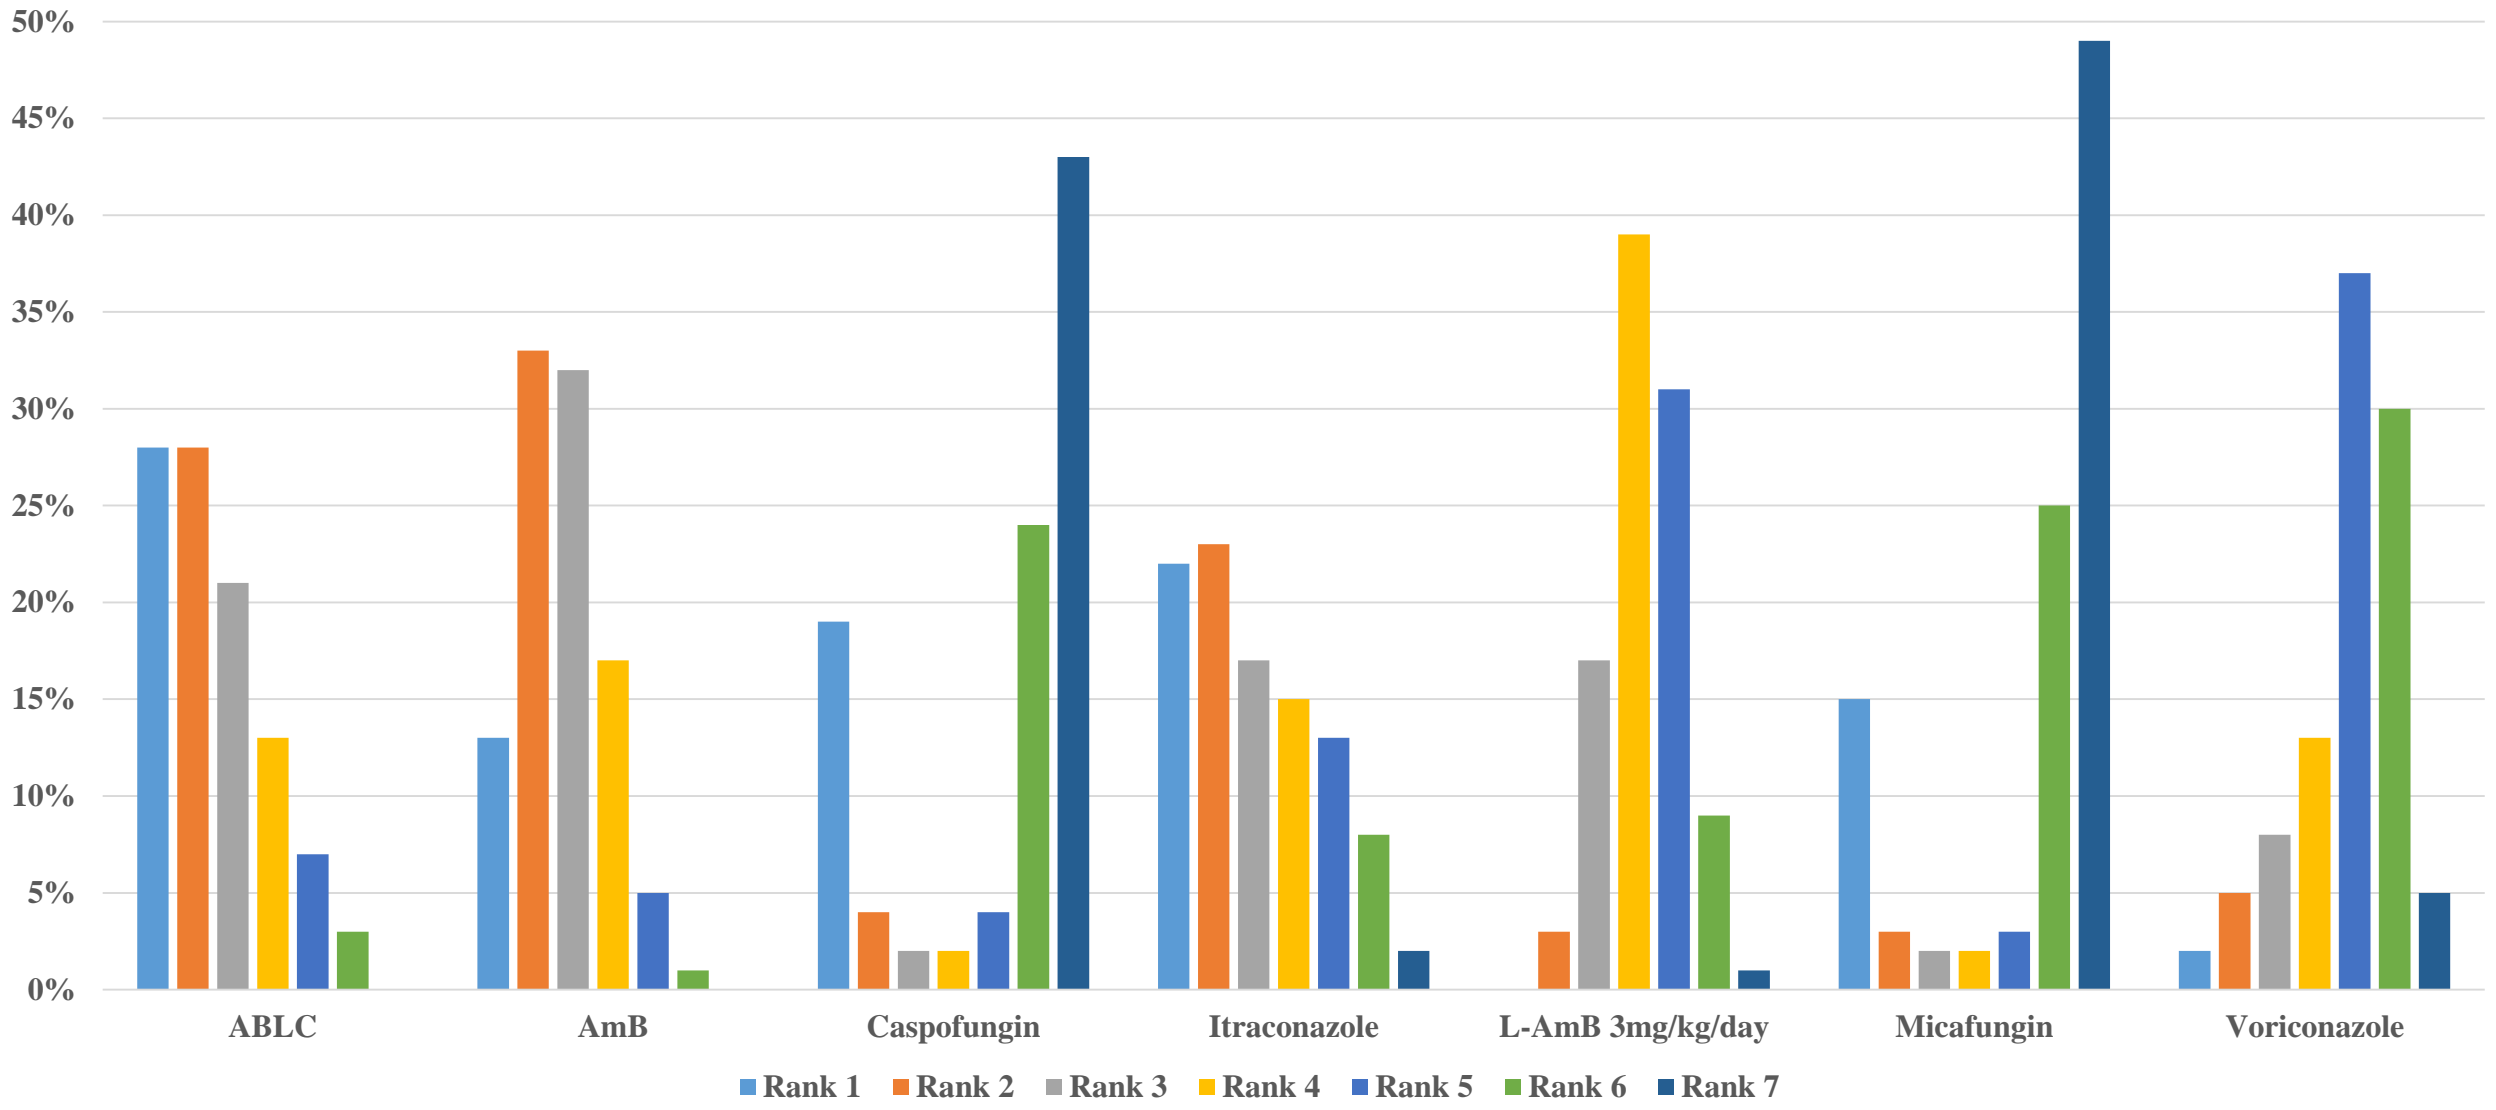

**Figure S19.** Rank probability plot of antifungals for fungal infection-related mortality in sensitivity analysis  
 ABLC: Amphotericin B lipid complex; AmB: Conventional amphotericin B; L-AmB: Liposomal amphotericin B  
 Rank 1 is worst, rank 7 is best.

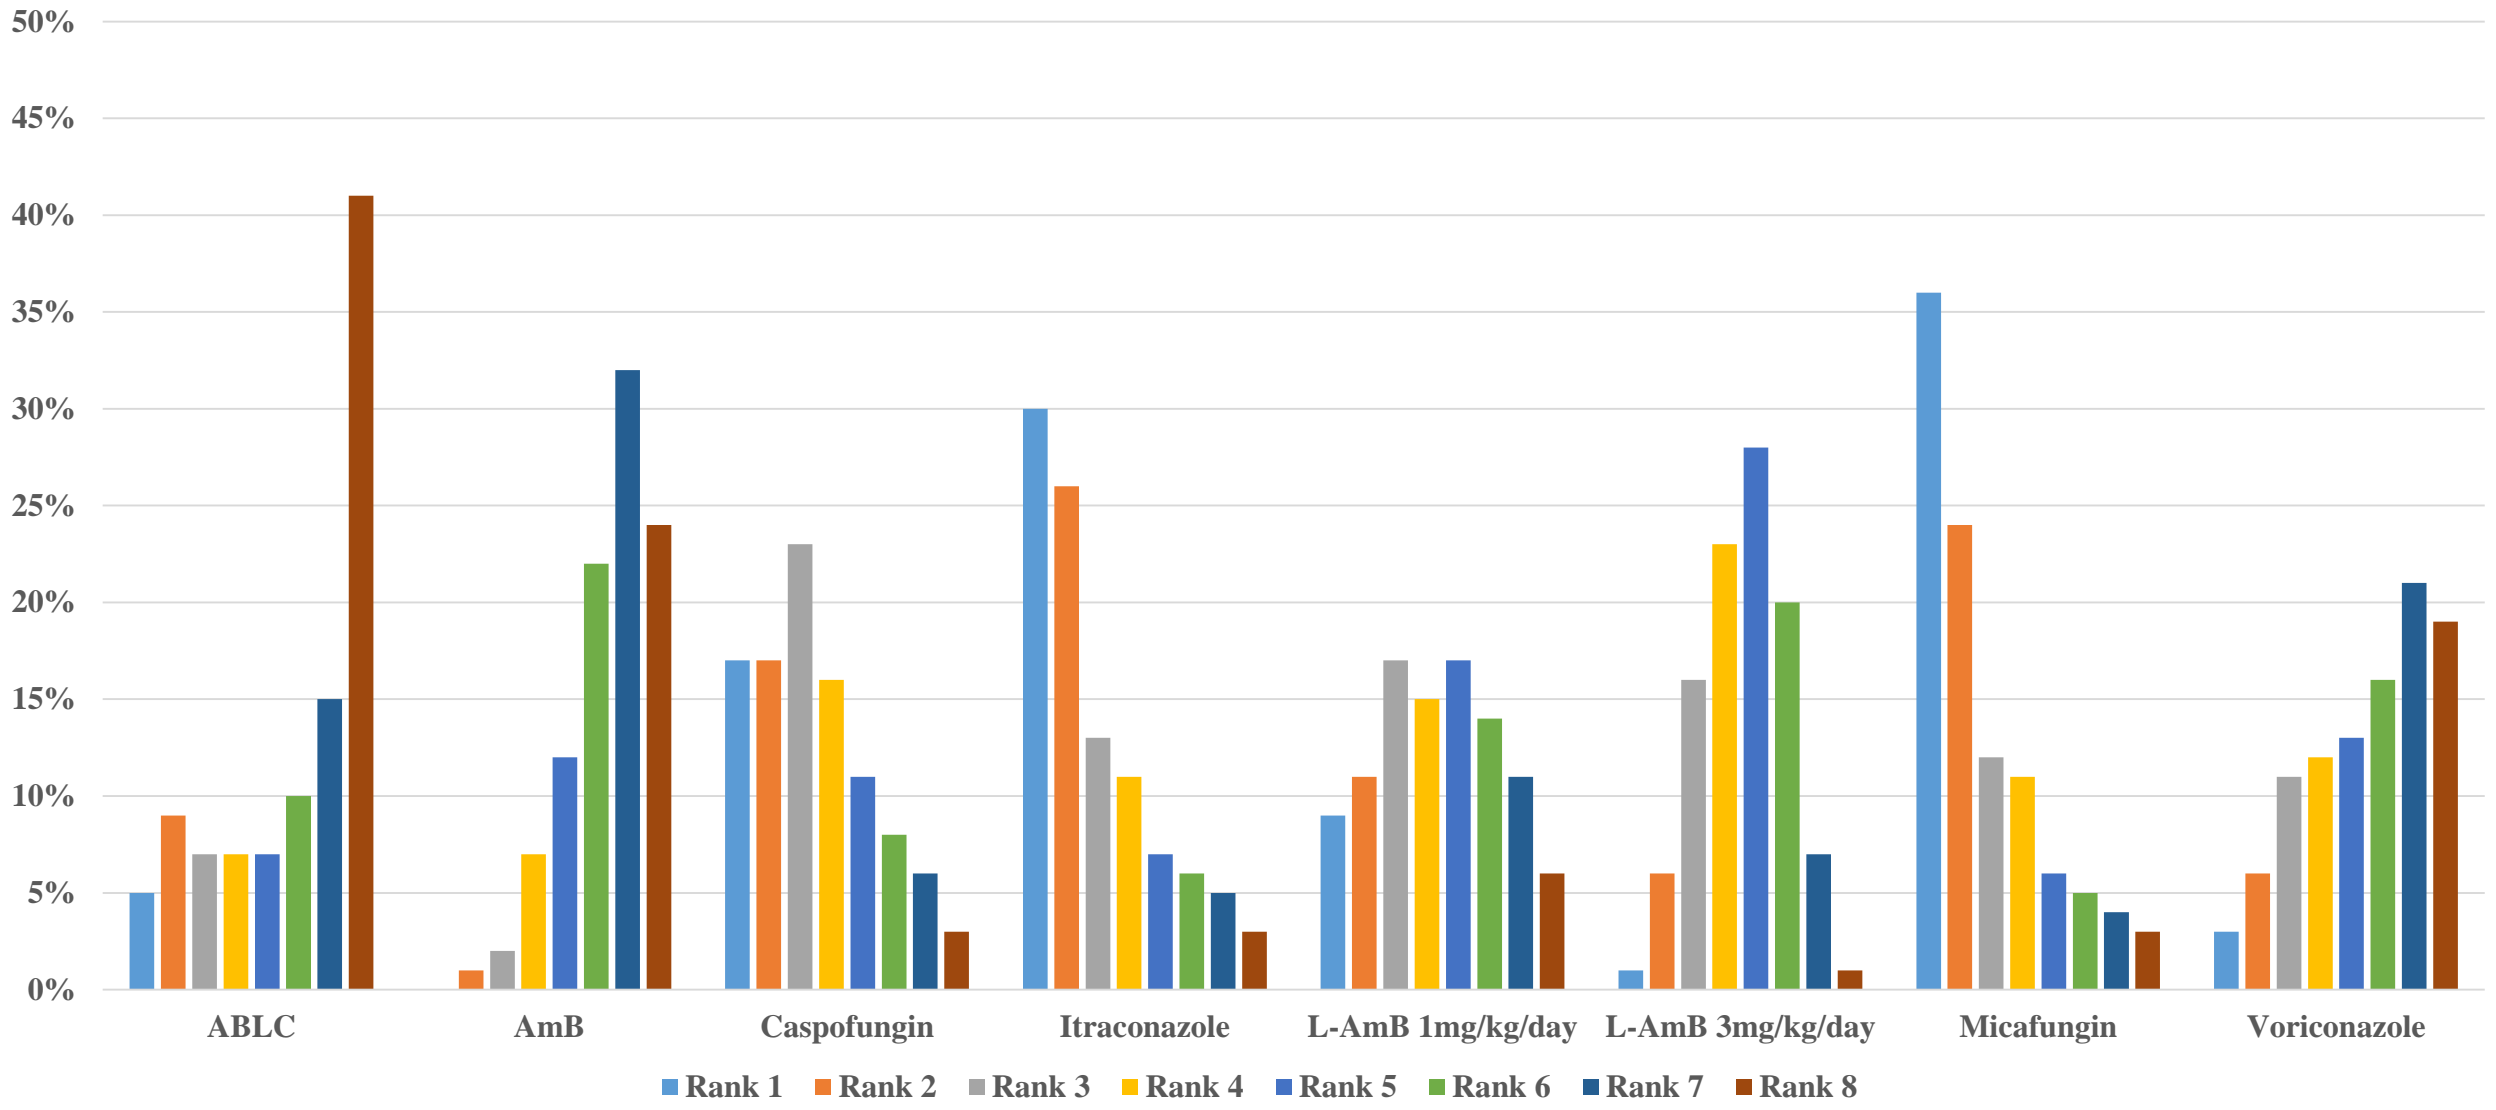

**Figure S20.** Rank probability plot of antifungals for treatment response in sensitivity analysis  
 ABLC: Amphotericin B lipid complex; AmB: Conventional amphotericin B; L-AmB: Liposomal amphotericin B  
 Rank 1 is best, rank 8 is worst.
